# Supplementary material
Source: PubMed Central journal article supplement (PMC9353949)
Supplement: NIHMS1827488-supplement-supplemental_material.pdf [file NIHMS1827488-supplement-supplemental_material.pdf]

# Progress and disparities in early identification of autism spectrum disorder: ADDM Network, 2002–2016

Supplementals

2021 Dec 06

## Contents

|                                                                                                          |    |
|----------------------------------------------------------------------------------------------------------|----|
| Data summary . . . . .                                                                                   | 2  |
| Table S1 . . . . .                                                                                       | 2  |
| Progress in early identification of ASD over time . . . . .                                              | 3  |
| Figure S1 . . . . .                                                                                      | 3  |
| Table S2 . . . . .                                                                                       | 4  |
| Geographic variability in progress over time . . . . .                                                   | 5  |
| Figure S2 . . . . .                                                                                      | 5  |
| Table S3 . . . . .                                                                                       | 6  |
| Differences in early identification by co-occurring intellectual disability . . . . .                    | 7  |
| Figure S3 . . . . .                                                                                      | 7  |
| Table S4 . . . . .                                                                                       | 8  |
| Table S5 . . . . .                                                                                       | 9  |
| Differences in early identification by race/ethnicity . . . . .                                          | 10 |
| Figure S4 . . . . .                                                                                      | 10 |
| Table S6 . . . . .                                                                                       | 11 |
| Table S7 . . . . .                                                                                       | 12 |
| Differences in early identification by race/ethnicity and co-occurring intellectual disability . . . . . | 13 |
| Figure S5 . . . . .                                                                                      | 13 |
| Figure S6 . . . . .                                                                                      | 14 |
| Table S8 . . . . .                                                                                       | 15 |
| Figure S7 . . . . .                                                                                      | 16 |
| Table S9 . . . . .                                                                                       | 17 |

# Data summary

Table S1

Denominators, number of children aged 8 who met the ADDM surveillance case definition for ASD, and among those children who met the case definition the number identified (with a recorded ASD diagnosis or special educational eligibility) overall and by site by surveillance year.

| Site      | 2002        |      |            | 2004        |      |            | 2006        |      |            | 2008        |      |            | 2010        |      |            | 2012        |      |            | 2014        |      |            | 2016        |      |            |
|-----------|-------------|------|------------|-------------|------|------------|-------------|------|------------|-------------|------|------------|-------------|------|------------|-------------|------|------------|-------------|------|------------|-------------|------|------------|
|           | Denominator | ASD  | Identified |
| All-Sites | 407578      | 2680 | 1810       | 172335      | 1370 | 982        | 308038      | 2753 | 2001       | 337093      | 3814 | 2804       | 363749      | 5333 | 4108       | 328824      | 4866 | 3836       | 325483      | 5469 | 4256       | 275419      | 5108 | 4223       |
| ID Sites* | 206928      | 2027 | 1347       | 113072      | 1004 | 704        | 175457      | 2024 | 1426       | 157855      | 2891 | 2101       | 242120      | 4224 | 3239       | 267398      | 3649 | 2869       | 265113      | 4108 | 3248       | 259784      | 3951 | 3293       |
| AL        | 35472       | 116  | 70         | 11676       | 54   | 36         | 35126       | 212  | 133        | 36566       | 172  | 116        | 21833       | 124  | 93         |             |      |            |             |      |            |             |      |            |
| AR        | 36472       | 251  | 191        |             |      |            |             |      |            | 4940        | 52   | 36         | 38956       | 605  | 457        | 14153       | 125  | 96         | 39992       | 522  | 456        | 40225       | 606  | 545        |
| AZ        | 45113       | 279  | 157        | 13620       | 133  | 57         | 41650       | 502  | 306        | 32601       | 506  | 327        | 33768       | 529  | 379        | 32615       | 493  | 389        | 24952       | 349  | 294        | 17656       | 282  | 265        |
| CO        | 11020       | 64   | 35         |             |      |            | 7184        | 54   | 34         | 7725        | 91   | 57         | 38806       | 384  | 233        | 40538       | 435  | 279        | 41128       | 572  | 315        | 40874       | 537  | 373        |
| FL        |             |      |            |             |      |            | 27615       | 116  | 101        | 29366       | 210  | 149        |             |      |            |             |      |            |             |      |            |             |      |            |
| GA        | 44299       | 336  | 231        | 45190       | 401  | 297        | 46621       | 472  | 349        | 50427       | 600  | 471        | 48529       | 752  | 622        | 49720       | 770  | 637        | 51161       | 866  | 715        | 24113       | 456  | 382        |
| MD†       | 29722       | 199  | 145        | 20981       | 180  | 150        | 26489       | 243  | 213        | 27022       | 336  | 251        | 27605       | 458  | 382        | 9577        | 172  | 144        | 9955        | 199  | 168        | 9993        | 192  | 157        |
| MN        |             |      |            |             |      |            |             |      |            |             |      |            |             |      |            |             |      |            | 9767        | 233  | 180        | 13728       | 313  | 248        |
| MO        | 28049       | 205  | 142        | 26970       | 221  | 166        | 26533       | 321  | 251        | 25668       | 357  | 279        | 25367       | 359  | 308        | 25870       | 300  | 261        | 25333       | 356  | 312        | 15635       | 213  | 194        |
| NC        | 20725       | 135  | 85         | 20187       | 176  | 128        | 22195       | 230  | 158        | 36913       | 524  | 361        | 37783       | 654  | 463        | 38913       | 653  | 476        | 30283       | 527  | 417        | 19291       | 489  | 375        |
| NJ        | 29748       | 314  | 213        |             |      |            |             |      |            | 7082        | 145  | 98         | 31723       | 696  | 521        | 32581       | 803  | 652        | 32935       | 964  | 697        | 33031       | 1036 | 847        |
| PA        | 21061       | 111  | 86         |             |      |            | 17886       | 150  | 121        | 18440       | 245  | 208        |             |      |            |             |      |            |             |      |            |             |      |            |
| SC        | 23191       | 140  | 74         | 22399       | 117  | 74         | 22681       | 196  | 137        | 23769       | 264  | 198        |             |      |            | 24356       | 300  | 230        |             |      |            |             |      |            |
| TN        |             |      |            |             |      |            |             |      |            |             |      |            |             |      |            |             |      |            | 24940       | 387  | 298        | 25839       | 405  | 320        |
| UT        | 26108       | 196  | 148        |             |      |            |             |      |            | 2123        | 45   | 31         | 23756       | 442  | 359        | 24945       | 431  | 364        |             |      |            |             |      |            |
| WI        | 35126       | 181  | 129        | 11312       | 88   | 74         | 34058       | 257  | 198        | 34451       | 267  | 222        | 35623       | 330  | 291        | 35556       | 384  | 308        | 35037       | 494  | 404        | 35034       | 579  | 517        |
| WV        | 21472       | 153  | 104        |             |      |            |             |      |            |             |      |            |             |      |            |             |      |            |             |      |            |             |      |            |

\* Sites included in ID calculations (based on having at least 80% complete ID case status data in 2002, at least 70% from 2004 to 2014, and at least 60% in 2016):

2002 - AR, AZ, CO, GA, NC, SC, UT

2004 - AL, AZ, GA, NC, SC

2006 - AL, AZ, CO, GA, NC, SC

2008 - AR, AZ, GA, NC, NJ, SC, UT

2010 - AR, AZ, GA, MD, NC, NJ, UT

2012 - AR, AZ, CO, GA, MD, NC, NJ, SC, UT

2014 - AR, AZ, CO, GA, MD, MN, NC, NJ, TN

2016 - AR, AZ, CO, GA, MD, MN, NC, NJ, TN, WI

† 'Education and health records review area' used for Maryland from 2012 prevalence report.

# Progress in early identification of ASD over time

Figure S1

Median age at autism spectrum disorder (ASD) identification among identified children, median age at ASD identification including unidentified children, and cumulative incidence of ASD identified by age 48 months per 1,000 children by year in the ADDM Network

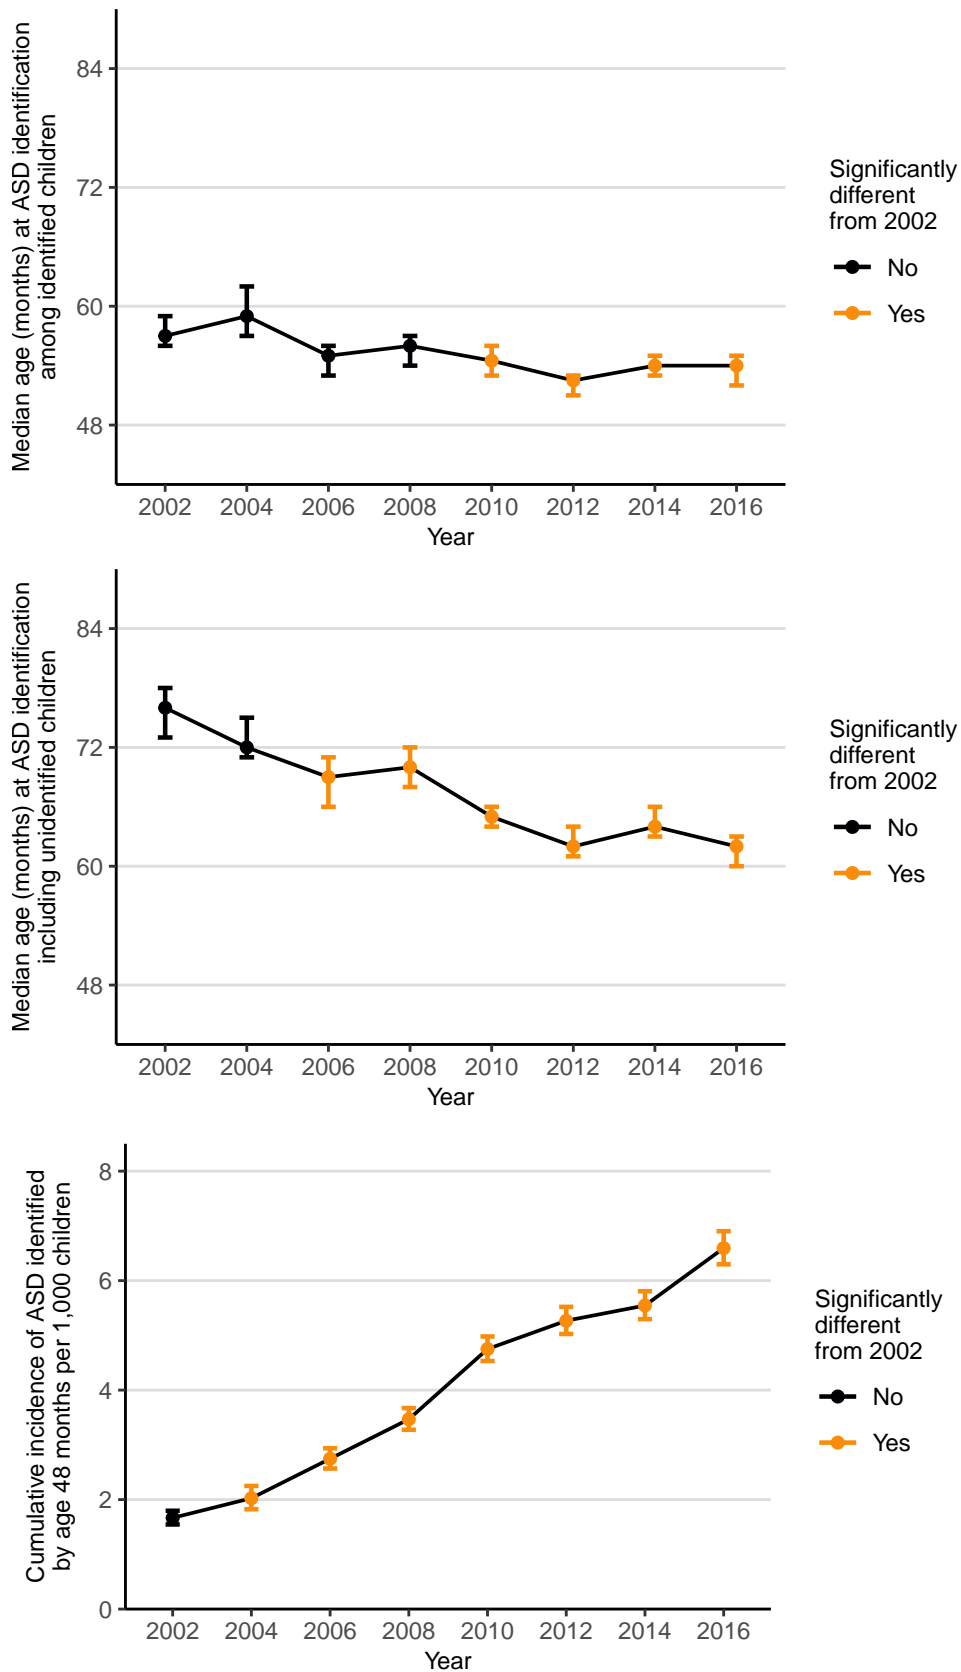

Table S2

Median age at autism spectrum disorder (ASD) identification among identified children, median age at ASD identification including unidentified children, and cumulative incidence of ASD identified by age 48 months per 1,000 children by year in the ADDM Network

| Year | Median among identified               |                      |      | Median including unidentified         |                      |      | Cumulative incidence                           |                               |                                |
|------|---------------------------------------|----------------------|------|---------------------------------------|----------------------|------|------------------------------------------------|-------------------------------|--------------------------------|
|      | Median age at identification (95% CI) | Difference from 2002 | P    | Median age at identification (95% CI) | Difference from 2002 | P    | Cumulative incidence by age 48 months (95% CI) | Difference from 2002 (95% CI) | Risk relative to 2002 (95% CI) |
| 2002 | 57 (56-59)                            |                      |      | 76 (73-78)                            |                      |      | 1.7 (1.5 - 1.8)                                |                               |                                |
| 2004 | 59 (57-62)                            | 2                    | 0.25 | 72 (71-75)                            | -4                   | 0.08 | 2.0 (1.8 - 2.2)                                | 0.4 (0.1 - 0.6)               | 1.2 (1.1 - 1.4)                |
| 2006 | 55 (53-56)                            | -2                   | 0.27 | 69 (66-71)                            | -7                   | 0    | 2.7 (2.6 - 2.9)                                | 1.1 (0.9 - 1.3)               | 1.6 (1.5 - 1.8)                |
| 2008 | 56 (54-57)                            | -1                   | 0.68 | 70 (68-72)                            | -6                   | 0    | 3.5 (3.3 - 3.7)                                | 1.8 (1.6 - 2.0)               | 2.1 (1.9 - 2.3)                |
| 2010 | 54.5 (53-56)                          | -2.5                 | 0.01 | 65 (64-66)                            | -11                  | 0    | 4.8 (4.5 - 5.0)                                | 3.1 (2.8 - 3.3)               | 2.9 (2.6 - 3.1)                |
| 2012 | 52.5 (51-53)                          | -4.5                 | 0    | 62 (61-64)                            | -14                  | 0    | 5.3 (5.0 - 5.5)                                | 3.6 (3.3 - 3.9)               | 3.2 (2.9 - 3.5)                |
| 2014 | 54 (53-55)                            | -3                   | 0.01 | 64 (63-66)                            | -12                  | 0    | 5.5 (5.3 - 5.8)                                | 3.9 (3.6 - 4.2)               | 3.3 (3.0 - 3.6)                |
| 2016 | 54 (52-55)                            | -3                   | 0.01 | 62 (60-63)                            | -14                  | 0    | 6.6 (6.3 - 6.9)                                | 4.9 (4.6 - 5.3)               | 4.0 (3.6 - 4.3)                |

Highlighted P values, risk differences, and risk ratios are significant.  
Ages are represented in months.

## Geographic variability in progress over time

Figure S2

Median age at autism spectrum disorder (ASD) identification among identified children and median age at ASD identification including unidentified children by year at nine sites participating in the ADDM Network from 2008–2016

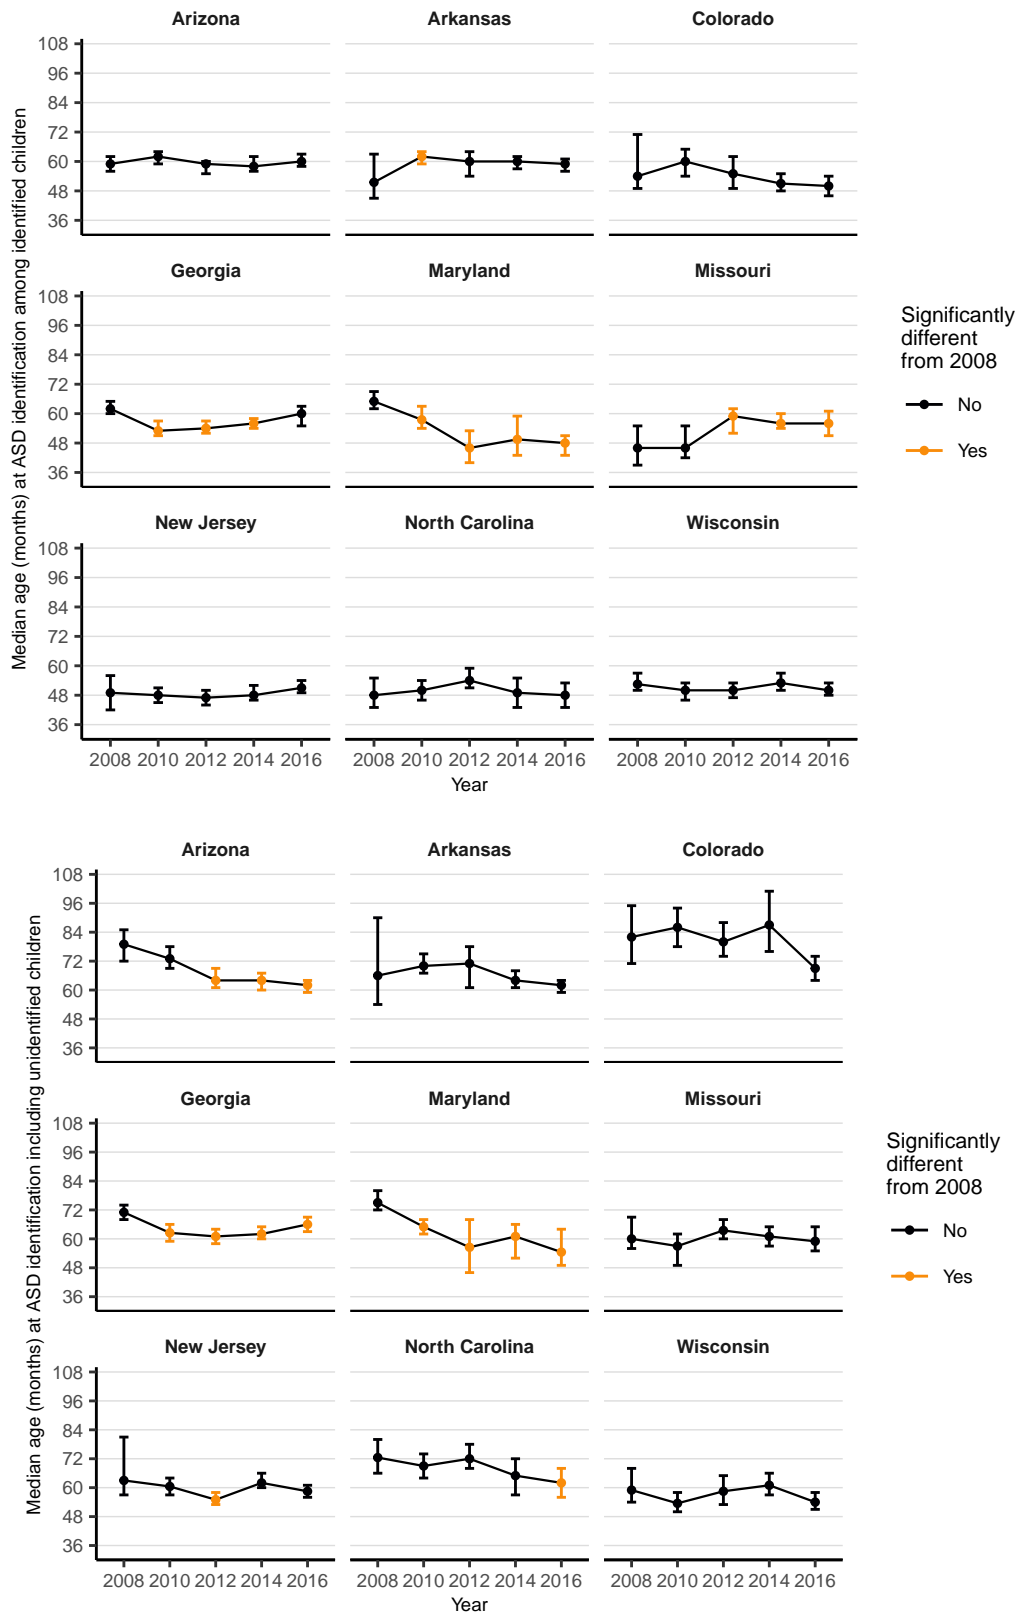

**Table S3**

**Median age at autism spectrum disorder (ASD) identification among identified children, median age at ASD identification including unidentified children, and cumulative incidence of ASD identified by age 48 months per 1,000 children by year at nine sites participating in ADDM from 2008–2016**

| Site           | Year | Median among identified               |                      |      | Median including unidentified         |                      |      | Cumulative incidence                           |                               |                                |
|----------------|------|---------------------------------------|----------------------|------|---------------------------------------|----------------------|------|------------------------------------------------|-------------------------------|--------------------------------|
|                |      | Median age at identification (95% CI) | Difference from 2008 | P    | Median age at identification (95% CI) | Difference from 2008 | P    | Cumulative incidence by age 48 months (95% CI) | Difference from 2008 (95% CI) | Risk relative to 2008 (95% CI) |
| Arizona        | 2008 | 59 (56-62)                            |                      |      | 79 (72-85)                            |                      |      | 3.4 (2.8 - 4.1)                                |                               |                                |
| Arizona        | 2010 | 62 (59-64)                            | 3                    | 0.22 | 73 (69-78)                            | -6                   | 0.16 | 3.6 (3.0 - 4.3)                                | 0.2 (-0.7 - 1.1)              | 1.1 (0.8 - 1.4)                |
| Arizona        | 2012 | 59 (55-60)                            | 0                    | 1    | 64 (61-69)                            | -15                  | 0    | 4.3 (3.6 - 5.0)                                | 0.9 (-0.1 - 1.8)              | 1.3 (1.0 - 1.6)                |
| Arizona        | 2014 | 58 (56-62)                            | -1                   | 0.82 | 64 (60-67)                            | -15                  | 0    | 3.8 (3.1 - 4.6)                                | 0.4 (-0.6 - 1.4)              | 1.1 (0.8 - 1.5)                |
| Arizona        | 2016 | 60 (58-63)                            | 1                    | 0.74 | 62 (59-64)                            | -17                  | 0    | 4.1 (3.3 - 5.2)                                | 0.7 (-0.4 - 1.9)              | 1.2 (0.9 - 1.6)                |
| Arkansas       | 2008 | 51.5 (45-63)                          |                      |      | 66 (54-90)                            |                      |      | 3.2 (2.0 - 5.3)                                |                               |                                |
| Arkansas       | 2010 | 62 (59-64)                            | 10.5                 | 0.03 | 70 (67-75)                            | 4                    | 0.56 | 3.5 (2.9 - 4.1)                                | 0.2 (-1.9 - 1.6)              | 1.1 (0.6 - 1.8)                |
| Arkansas       | 2012 | 60 (54-64)                            | 8.5                  | 0.15 | 71 (61-78)                            | 5                    | 0.81 | 2.3 (1.7 - 3.3)                                | -0.9 (-3.0 - 0.7)             | 0.7 (0.4 - 1.3)                |
| Arkansas       | 2014 | 60 (57-62)                            | 8.5                  | 0.12 | 64 (61-68)                            | -2                   | 0.8  | 3.9 (3.3 - 4.5)                                | 0.6 (-1.5 - 2.0)              | 1.2 (0.7 - 2.0)                |
| Arkansas       | 2016 | 59 (56-61)                            | 7.5                  | 0.15 | 62 (59-64)                            | -4                   | 0.4  | 4.6 (4.0 - 5.3)                                | 1.4 (-0.7 - 2.8)              | 1.4 (0.9 - 2.4)                |
| Colorado       | 2008 | 54 (49-71)                            |                      |      | 82 (71-95)                            |                      |      | 2.7 (1.8 - 4.2)                                |                               |                                |
| Colorado       | 2010 | 60 (54-65)                            | 6                    | 0.36 | 86 (78-94)                            | 4                    | 0.8  | 2.2 (1.8 - 2.7)                                | -0.5 (-2.0 - 0.5)             | 0.8 (0.5 - 1.3)                |
| Colorado       | 2012 | 55 (49-62)                            | 1                    | 0.94 | 80 (74-88)                            | -2                   | 0.88 | 3.0 (2.5 - 3.6)                                | 0.3 (-1.2 - 1.4)              | 1.1 (0.7 - 1.7)                |
| Colorado       | 2014 | 51 (48-55)                            | -3                   | 0.49 | 87 (76-101)                           | 5                    | 0.71 | 3.5 (2.9 - 4.1)                                | 0.7 (-0.8 - 1.9)              | 1.3 (0.8 - 2.0)                |
| Colorado       | 2016 | 50 (46-54)                            | -4                   | 0.44 | 69 (64-74)                            | -13                  | 0.08 | 4.5 (3.9 - 5.1)                                | 1.7 (0.2 - 2.9)               | 1.6 (1.0 - 2.6)                |
| Georgia        | 2008 | 62 (60-65)                            |                      |      | 71 (68-74)                            |                      |      | 3.1 (2.7 - 3.6)                                |                               |                                |
| Georgia        | 2010 | 53 (51-57)                            | -9                   | 0    | 62.5 (59-66)                          | -8.5                 | 0    | 5.4 (4.8 - 6.1)                                | 2.3 (1.5 - 3.2)               | 1.7 (1.4 - 2.1)                |
| Georgia        | 2012 | 54 (52-57)                            | -8                   | 0    | 61 (58-64)                            | -10                  | 0    | 5.3 (4.7 - 6.0)                                | 2.2 (1.4 - 3.0)               | 1.7 (1.4 - 2.1)                |
| Georgia        | 2014 | 56 (54-58)                            | -6                   | 0    | 62 (60-65)                            | -9                   | 0    | 5.6 (5.0 - 6.3)                                | 2.5 (1.7 - 3.3)               | 1.8 (1.5 - 2.2)                |
| Georgia        | 2016 | 60 (55-63)                            | -2                   | 0.54 | 66 (63-69)                            | -5                   | 0.03 | 5.8 (4.9 - 6.8)                                | 2.7 (1.6 - 3.8)               | 1.9 (1.5 - 2.3)                |
| Maryland       | 2008 | 65 (62-69)                            |                      |      | 75 (72-80)                            |                      |      | 2.7 (2.2 - 3.4)                                |                               |                                |
| Maryland       | 2010 | 57.5 (54-63)                          | -7.5                 | 0.01 | 65 (62-68)                            | -10                  | 0    | 5.2 (4.4 - 6.1)                                | 2.5 (1.4 - 3.6)               | 1.9 (1.4 - 2.5)                |
| Maryland       | 2012 | 46 (40-53)                            | -19                  | 0    | 56.5 (46-68)                          | -18.5                | 0    | 8.5 (6.8 - 10.5)                               | 5.7 (3.9 - 7.8)               | 3.1 (2.3 - 4.2)                |
| Maryland       | 2014 | 49.5 (43-59)                          | -15.5                | 0    | 61 (52-66)                            | -14                  | 0    | 8.0 (6.5 - 10.0)                               | 5.3 (3.6 - 7.3)               | 2.9 (2.1 - 4.0)                |
| Maryland       | 2016 | 48 (43-51)                            | -17                  | 0    | 54.5 (49-64)                          | -20.5                | 0    | 8.0 (6.4 - 10.0)                               | 5.3 (3.6 - 7.3)               | 2.9 (2.1 - 4.0)                |
| Missouri       | 2008 | 46 (39-55)                            |                      |      | 60 (56-69)                            |                      |      | 5.6 (4.7 - 6.6)                                |                               |                                |
| Missouri       | 2010 | 46 (42-55)                            | 0                    | 1    | 57 (49-62)                            | -3                   | 0.42 | 6.3 (5.4 - 7.4)                                | 0.8 (-0.6 - 2.1)              | 1.1 (0.9 - 1.4)                |
| Missouri       | 2012 | 59 (52-62)                            | 13                   | 0    | 63.5 (60-68)                          | 3.5                  | 0.45 | 4.1 (3.4 - 5.0)                                | -1.5 (-2.7 - -0.3)            | 0.7 (0.6 - 0.9)                |
| Missouri       | 2014 | 56 (54-60)                            | 10                   | 0    | 61 (57-65)                            | 1                    | 0.88 | 4.7 (4.0 - 5.7)                                | -0.8 (-2.1 - 0.4)             | 0.9 (0.7 - 1.1)                |
| Missouri       | 2016 | 56 (51-61)                            | 10                   | 0.02 | 59 (55-65)                            | -1                   | 0.85 | 4.9 (3.9 - 6.1)                                | -0.7 (-2.1 - 0.8)             | 0.9 (0.7 - 1.2)                |
| New Jersey     | 2008 | 49 (42-56)                            |                      |      | 63 (57-81)                            |                      |      | 6.8 ( 5.1 - 9.0)                               |                               |                                |
| New Jersey     | 2010 | 48 (45-51)                            | -1                   | 0.86 | 60.5 (57-64)                          | -2.5                 | 0.6  | 8.4 ( 7.4 - 9.4)                               | 1.6 (-0.8 - 3.6)              | 1.2 (0.9 - 1.7)                |
| New Jersey     | 2012 | 47 (44-50)                            | -2                   | 0.69 | 55 (53-58)                            | -8                   | 0.04 | 10.4 ( 9.4 - 11.6)                             | 3.6 (1.2 - 5.7)               | 1.5 (1.1 - 2.1)                |
| New Jersey     | 2014 | 48 (46-52)                            | -1                   | 0.87 | 62 (60-66)                            | -1                   | 0.87 | 10.7 ( 9.6 - 11.8)                             | 3.9 (1.5 - 5.9)               | 1.6 (1.2 - 2.1)                |
| New Jersey     | 2016 | 51 (49-54)                            | 2                    | 0.66 | 58.5 (56-61)                          | -4.5                 | 0.18 | 11.9 (10.8 - 13.2)                             | 5.2 (2.7 - 7.2)               | 1.8 (1.3 - 2.4)                |
| North Carolina | 2008 | 48 (43-55)                            |                      |      | 72.5 (66-80)                          |                      |      | 4.9 (4.2 - 5.7)                                |                               |                                |
| North Carolina | 2010 | 50 (46-54)                            | 2                    | 0.75 | 69 (64-74)                            | -3.5                 | 0.33 | 6.0 (5.3 - 6.8)                                | 1.1 (0.0 - 2.2)               | 1.2 (1.0 - 1.5)                |
| North Carolina | 2012 | 54 (51-59)                            | 6                    | 0.09 | 72 (68-78)                            | -0.5                 | 0.89 | 5.3 (4.7 - 6.1)                                | 0.4 (-0.6 - 1.5)              | 1.1 (0.9 - 1.3)                |
| North Carolina | 2014 | 49 (43-55)                            | 1                    | 1    | 65 (57-72)                            | -7.5                 | 0.09 | 6.9 (6.0 - 7.9)                                | 2.0 (0.8 - 3.2)               | 1.4 (1.1 - 1.7)                |
| North Carolina | 2016 | 48 (43-53)                            | 0                    | 1    | 62 (56-68)                            | -10.5                | 0.01 | 9.9 (8.6 - 11.4)                               | 5.0 (3.5 - 6.6)               | 2.0 (1.6 - 2.5)                |
| Wisconsin      | 2008 | 52.5 (50-57)                          |                      |      | 59 (54-68)                            |                      |      | 2.8 (2.3 - 3.4)                                |                               |                                |
| Wisconsin      | 2010 | 50 (46-53)                            | -2.5                 | 0.34 | 53.5 (50-58)                          | -5.5                 | 0.13 | 4.0 (3.4 - 4.7)                                | 1.2 (0.3 - 2.0)               | 1.4 (1.1 - 1.8)                |
| Wisconsin      | 2012 | 50 (47-53)                            | -2.5                 | 0.31 | 58.5 (53-65)                          | -0.5                 | 0.89 | 4.2 (3.6 - 4.9)                                | 1.4 (0.6 - 2.3)               | 1.5 (1.2 - 2.0)                |
| Wisconsin      | 2014 | 53 (50-57)                            | 0.5                  | 0.88 | 61 (57-66)                            | 2                    | 0.73 | 4.8 (4.2 - 5.6)                                | 2.0 (1.1 - 3.0)               | 1.7 (1.3 - 2.2)                |
| Wisconsin      | 2016 | 50 (48-53)                            | -2.5                 | 0.36 | 54 (51-58)                            | -5                   | 0.19 | 7.1 (6.3 - 8.0)                                | 4.3 (3.3 - 5.4)               | 2.5 (2.0 - 3.2)                |

Highlighted P values, risk differences, and risk ratios are significant.  
Ages are represented in months.

# Differences in early identification by co-occurring intellectual disability

Figure S3

Difference in incidence of autism spectrum disorder (ASD) identified per 1,000 children aged 8 years for each month of age by co-occurring intellectual disability by year compared to 2002 in the ADDM Network

Note: Limited to sites with IQ data in ADDM surveillance reports; excludes children with unknown ID case status.

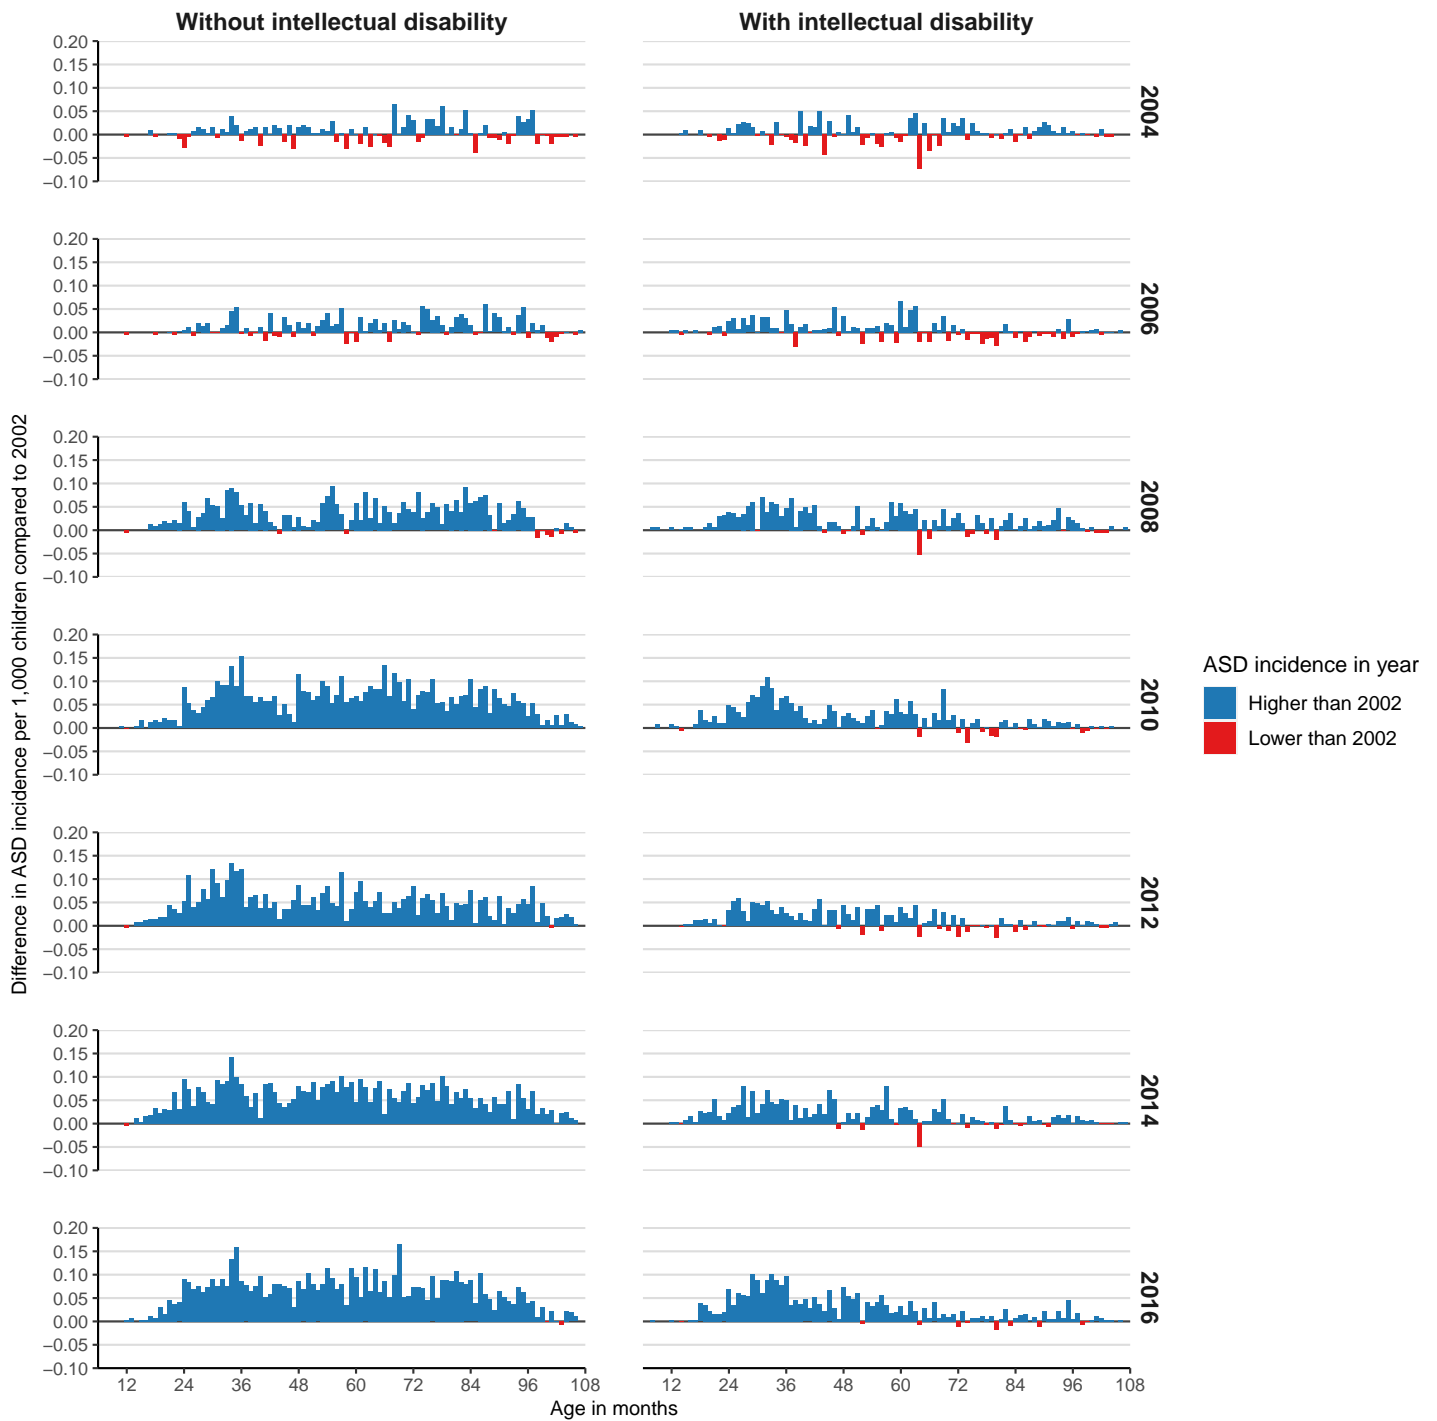

**Table S4**

**Comparison of median age at autism spectrum disorder (ASD) identification among identified children, median age at ASD identification including unidentified children, and cumulative incidence of ASD identified by age 48 months per 1,000 children between children with and without co-occurring intellectual disability (ID) by year in the ADDM Network**

Note: Limited to sites with IQ data in ADDM surveillance reports; excludes children with unknown ID case status.

| Year | Median among identified |            |            |   | Median including unidentified |            |            |   | Cumulative incidence |                 |                                  |                             |
|------|-------------------------|------------|------------|---|-------------------------------|------------|------------|---|----------------------|-----------------|----------------------------------|-----------------------------|
|      | With ID                 | Without ID | Difference | P | With ID                       | Without ID | Difference | P | With ID              | Without ID      | With ID to Without ID difference | With ID to Without ID ratio |
| 2002 | 54 (52-56)              | 63 (60-66) | -9         | 0 | 67 (64-72)                    | 86 (83-90) | -19        | 0 | 0.8 (0.7 - 1.0)      | 0.6 (0.5 - 0.8) | 0.2 (0.0 - 0.4)                  | 1.3 (1.0 - 1.6)             |
| 2004 | 54 (50-59)              | 68 (63-71) | -14        | 0 | 67 (63-72)                    | 81 (77-86) | -14        | 0 | 1.0 (0.8 - 1.2)      | 0.8 (0.6 - 0.9) | 0.2 (0.0 - 0.5)                  | 1.3 (1.0 - 1.7)             |
| 2006 | 48 (46-50)              | 64 (63-66) | -16        | 0 | 59 (56-62)                    | 81 (78-83) | -22        | 0 | 1.3 (1.1 - 1.4)      | 0.9 (0.8 - 1.0) | 0.4 (0.1 - 0.6)                  | 1.4 (1.1 - 1.7)             |
| 2008 | 49 (46-52)              | 63 (62-65) | -14        | 0 | 60 (58-62)                    | 79 (76-81) | -19        | 0 | 1.8 (1.6 - 2.0)      | 1.7 (1.5 - 2.0) | 0.1 (-0.2 - 0.3)                 | 1.0 (0.9 - 1.2)             |
| 2010 | 46 (44-48)              | 61 (60-63) | -15        | 0 | 54 (52-57)                    | 73 (71-74) | -19        | 0 | 2.1 (1.9 - 2.2)      | 2.5 (2.3 - 2.7) | -0.4 (-0.7 - -0.1)               | 0.8 (0.7 - 0.9)             |
| 2012 | 48 (45-49)              | 58 (57-60) | -10        | 0 | 53 (51-55)                    | 70 (68-72) | -17        | 0 | 1.7 (1.5 - 1.8)      | 2.6 (2.4 - 2.8) | -0.9 (-1.1 - -0.6)               | 0.7 (0.6 - 0.7)             |
| 2014 | 46 (45-49)              | 60 (58-61) | -14        | 0 | 53 (50-55)                    | 71 (70-73) | -18        | 0 | 1.9 (1.7 - 2.1)      | 2.6 (2.4 - 2.8) | -0.7 (-1.0 - -0.4)               | 0.7 (0.7 - 0.8)             |
| 2016 | 45 (44-48)              | 60 (59-61) | -15        | 0 | 49 (48-51)                    | 68 (66-69) | -19        | 0 | 2.4 (2.3 - 2.6)      | 2.9 (2.7 - 3.1) | -0.4 (-0.7 - -0.1)               | 0.9 (0.8 - 1.0)             |

Highlighted P values, risk differences, and risk ratios are significant.

Ages are represented in months.



Table S5

Median age at autism spectrum disorder (ASD) identification among identified children, median age at ASD identification including unidentified children, and cumulative incidence of ASD identified by age 48 months per 1,000 children for children with and without co-occurring intellectual disability (ID) by year in the ADDM Network

Note: Limited to sites with IQ data in ADDM surveillance reports; excludes children with unknown ID case status.

| ID Case Status | Year | Median among identified               |                      |      | Median including unidentified         |                      |      | Cumulative incidence                           |                               |                                |
|----------------|------|---------------------------------------|----------------------|------|---------------------------------------|----------------------|------|------------------------------------------------|-------------------------------|--------------------------------|
|                |      | Median age at identification (95% CI) | Difference from 2002 | P    | Median age at identification (95% CI) | Difference from 2002 | P    | Cumulative incidence by age 48 months (95% CI) | Difference from 2002 (95% CI) | Risk relative to 2002 (95% CI) |
| Without ID     | 2002 | 63 (60-66)                            |                      |      | 86 (83-90)                            |                      |      | 0.6 (0.5 - 0.8)                                |                               |                                |
| Without ID     | 2004 | 68 (63-71)                            | 5                    | 0.04 | 81 (77-86)                            | -5                   | 0.14 | 0.8 (0.6 - 0.9)                                | 0.1 (-0.1 - 0.3)              | 1.2 (0.9 - 1.6)                |
| Without ID     | 2006 | 64 (63-66)                            | 1                    | 0.8  | 81 (78-83)                            | -5                   | 0.04 | 0.9 (0.8 - 1.0)                                | 0.3 (0.1 - 0.4)               | 1.4 (1.1 - 1.8)                |
| Without ID     | 2008 | 63 (62-65)                            | 0                    | 1    | 79 (76-81)                            | -7                   | 0    | 1.7 (1.5 - 2.0)                                | 1.1 (0.9 - 1.3)               | 2.7 (2.2 - 3.3)                |
| Without ID     | 2010 | 61 (60-63)                            | -2                   | 0.37 | 73 (71-74)                            | -13                  | 0    | 2.5 (2.3 - 2.7)                                | 1.8 (1.6 - 2.1)               | 3.8 (3.2 - 4.6)                |
| Without ID     | 2012 | 58 (57-60)                            | -5                   | 0    | 70 (68-72)                            | -16                  | 0    | 2.6 (2.4 - 2.8)                                | 1.9 (1.7 - 2.1)               | 4.0 (3.3 - 4.8)                |
| Without ID     | 2014 | 60 (58-61)                            | -3                   | 0.06 | 71 (70-73)                            | -15                  | 0    | 2.6 (2.4 - 2.8)                                | 2.0 (1.7 - 2.2)               | 4.0 (3.4 - 4.9)                |
| Without ID     | 2016 | 60 (59-61)                            | -3                   | 0.06 | 68 (66-69)                            | -18                  | 0    | 2.9 (2.7 - 3.1)                                | 2.2 (2.0 - 2.5)               | 4.5 (3.7 - 5.4)                |
| With ID        | 2002 | 54 (52-56)                            |                      |      | 67 (64-72)                            |                      |      | 0.8 (0.7 - 1.0)                                |                               |                                |
| With ID        | 2004 | 54 (50-59)                            | 0                    | 1    | 67 (63-72)                            | 0                    | 1    | 1.0 (0.8 - 1.2)                                | 0.2 (0.0 - 0.4)               | 1.2 (0.9 - 1.5)                |
| With ID        | 2006 | 48 (46-50)                            | -6                   | 0.01 | 59 (56-62)                            | -8                   | 0    | 1.3 (1.1 - 1.4)                                | 0.4 (0.2 - 0.6)               | 1.5 (1.2 - 1.8)                |
| With ID        | 2008 | 49 (46-52)                            | -5                   | 0.01 | 60 (58-62)                            | -7                   | 0    | 1.8 (1.6 - 2.0)                                | 1.0 (0.7 - 1.2)               | 2.1 (1.8 - 2.6)                |
| With ID        | 2010 | 46 (44-48)                            | -8                   | 0    | 54 (52-57)                            | -13                  | 0    | 2.1 (1.9 - 2.2)                                | 1.2 (1.0 - 1.5)               | 2.5 (2.1 - 2.9)                |
| With ID        | 2012 | 48 (45-49)                            | -6                   | 0    | 53 (51-55)                            | -14                  | 0    | 1.7 (1.5 - 1.8)                                | 0.9 (0.7 - 1.1)               | 2.0 (1.7 - 2.4)                |
| With ID        | 2014 | 46 (45-49)                            | -8                   | 0    | 53 (50-55)                            | -14                  | 0    | 1.9 (1.7 - 2.1)                                | 1.1 (0.9 - 1.3)               | 2.3 (1.9 - 2.7)                |
| With ID        | 2016 | 45 (44-48)                            | -9                   | 0    | 49 (48-51)                            | -18                  | 0    | 2.4 (2.3 - 2.6)                                | 1.6 (1.4 - 1.8)               | 2.9 (2.5 - 3.5)                |

Highlighted P values, risk differences, and risk ratios are significant.

Ages are represented in months.

## Differences in early identification by race/ethnicity

Figure S4

Median age at autism spectrum disorder (ASD) identification among identified children, median age at ASD identification including unidentified children, and cumulative incidence of autism spectrum disorder (ASD) identification by age 48 months per 1,000 children by race/ethnicity by year in the ADDM Network

Note: Missing upper limit of 95% confidence interval could not be calculated because it extends into censored values.

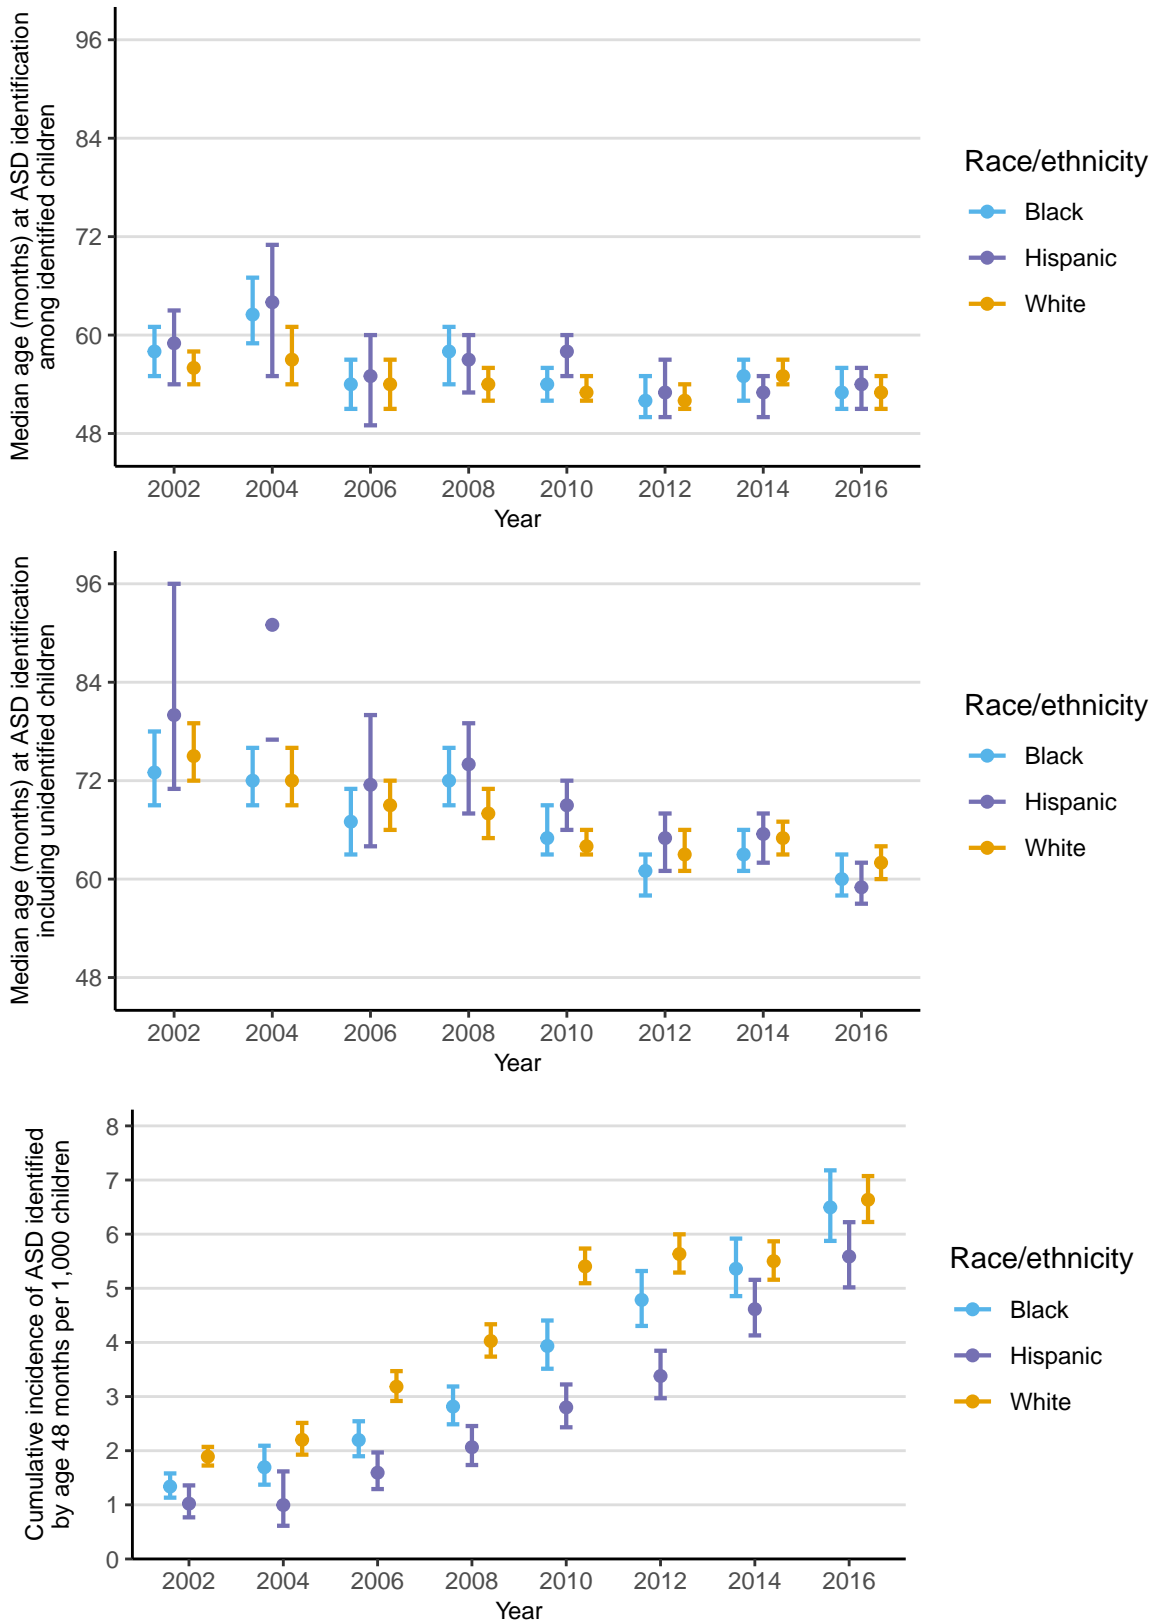

Table S6

Median age at autism spectrum disorder (ASD) identification among identified children, median age at ASD identification including unidentified children, and cumulative incidence of ASD identified by age 48 months per 1,000 children by race/ethnicity by year in the ADDM Network

| Race/ethnicity | Year | Median among identified               |                      |      | Median including unidentified         |                      |      | Cumulative incidence                           |                               |                                |
|----------------|------|---------------------------------------|----------------------|------|---------------------------------------|----------------------|------|------------------------------------------------|-------------------------------|--------------------------------|
|                |      | Median age at identification (95% CI) | Difference from 2002 | P    | Median age at identification (95% CI) | Difference from 2002 | P    | Cumulative incidence by age 48 months (95% CI) | Difference from 2002 (95% CI) | Risk relative to 2002 (95% CI) |
| Black          | 2002 | 58 (55-61)                            |                      |      | 73 (69-78)                            |                      |      | 1.3 (1.1 - 1.6)                                |                               |                                |
| Black          | 2004 | 62.5 (59-67)                          | 4.5                  | 0.07 | 72 (69-76)                            | -1                   | 0.79 | 1.7 (1.4 - 2.1)                                | 0.4 (0.0 - 0.8)               | 1.3 (1.0 - 1.7)                |
| Black          | 2006 | 54 (51-57)                            | -4                   | 0.08 | 67 (63-71)                            | -6                   | 0.08 | 2.2 (1.9 - 2.5)                                | 0.9 (0.5 - 1.3)               | 1.6 (1.3 - 2.0)                |
| Black          | 2008 | 58 (54-61)                            | 0                    | 1    | 72 (69-76)                            | -1                   | 0.96 | 2.8 (2.5 - 3.2)                                | 1.5 (1.1 - 1.9)               | 2.1 (1.7 - 2.6)                |
| Black          | 2010 | 54 (52-56)                            | -4                   | 0.12 | 65 (63-69)                            | -8                   | 0.01 | 3.9 (3.5 - 4.4)                                | 2.6 (2.1 - 3.1)               | 2.9 (2.4 - 3.6)                |
| Black          | 2012 | 52 (50-55)                            | -6                   | 0    | 61 (58-63)                            | -12                  | 0    | 4.8 (4.3 - 5.3)                                | 3.4 (2.9 - 4.0)               | 3.6 (2.9 - 4.4)                |
| Black          | 2014 | 55 (52-57)                            | -3                   | 0.26 | 63 (61-66)                            | -10                  | 0    | 5.4 (4.9 - 5.9)                                | 4.0 (3.5 - 4.6)               | 4.0 (3.3 - 4.9)                |
| Black          | 2016 | 53 (51-56)                            | -5                   | 0.02 | 60 (58-63)                            | -13                  | 0    | 6.5 (5.9 - 7.2)                                | 5.2 (4.5 - 5.9)               | 4.9 (4.0 - 5.9)                |
| Hispanic       | 2002 | 59 (54-63)                            |                      |      | 80 (71-96)                            |                      |      | 1.0 (0.8 - 1.4)                                |                               |                                |
| Hispanic       | 2004 | 64 (55-71)                            | 5                    | 0.25 | 91 (77-NA)                            | 11                   | 0.32 | 1.0 (0.6 - 1.6)                                | 0.0 (-0.5 - 0.6)              | 1.0 (0.6 - 1.7)                |
| Hispanic       | 2006 | 55 (49-60)                            | -4                   | 0.41 | 71.5 (64-80)                          | -8.5                 | 0.22 | 1.6 (1.3 - 2.0)                                | 0.6 (0.1 - 1.0)               | 1.6 (1.1 - 2.2)                |
| Hispanic       | 2008 | 57 (53-60)                            | -2                   | 0.53 | 74 (68-79)                            | -6                   | 0.29 | 2.1 (1.7 - 2.5)                                | 1.0 (0.6 - 1.5)               | 2.0 (1.4 - 2.8)                |
| Hispanic       | 2010 | 58 (55-60)                            | -1                   | 0.82 | 69 (66-72)                            | -11                  | 0.01 | 2.8 (2.4 - 3.2)                                | 1.8 (1.3 - 2.3)               | 2.7 (2.0 - 3.8)                |
| Hispanic       | 2012 | 53 (50-57)                            | -6                   | 0.19 | 65 (61-68)                            | -15                  | 0    | 3.4 (3.0 - 3.8)                                | 2.4 (1.8 - 2.9)               | 3.3 (2.4 - 4.5)                |
| Hispanic       | 2014 | 53 (50-55)                            | -6                   | 0.1  | 65.5 (62-68)                          | -14.5                | 0    | 4.6 (4.1 - 5.2)                                | 3.6 (3.0 - 4.2)               | 4.5 (3.3 - 6.1)                |
| Hispanic       | 2016 | 54 (51-56)                            | -5                   | 0.16 | 59 (57-62)                            | -21                  | 0    | 5.6 (5.0 - 6.2)                                | 4.6 (3.9 - 5.3)               | 5.5 (4.0 - 7.4)                |
| White          | 2002 | 56 (54-58)                            |                      |      | 75 (72-79)                            |                      |      | 1.9 (1.7 - 2.1)                                |                               |                                |
| White          | 2004 | 57 (54-61)                            | 1                    | 0.74 | 72 (69-76)                            | -3                   | 0.44 | 2.2 (1.9 - 2.5)                                | 0.3 (0.0 - 0.7)               | 1.2 (1.0 - 1.4)                |
| White          | 2006 | 54 (51-57)                            | -2                   | 0.33 | 69 (66-72)                            | -6                   | 0.01 | 3.2 (2.9 - 3.5)                                | 1.3 (1.0 - 1.6)               | 1.7 (1.5 - 1.9)                |
| White          | 2008 | 54 (52-56)                            | -2                   | 0.34 | 68 (65-71)                            | -7                   | 0    | 4.0 (3.7 - 4.3)                                | 2.1 (1.8 - 2.5)               | 2.1 (1.9 - 2.4)                |
| White          | 2010 | 53 (52-55)                            | -3                   | 0.07 | 64 (63-66)                            | -11                  | 0    | 5.4 (5.1 - 5.7)                                | 3.5 (3.2 - 3.9)               | 2.9 (2.6 - 3.2)                |
| White          | 2012 | 52 (51-54)                            | -4                   | 0.01 | 63 (61-66)                            | -12                  | 0    | 5.6 (5.3 - 6.0)                                | 3.7 (3.4 - 4.1)               | 3.0 (2.7 - 3.3)                |
| White          | 2014 | 55 (54-57)                            | -1                   | 0.89 | 65 (63-67)                            | -10                  | 0    | 5.5 (5.2 - 5.9)                                | 3.6 (3.2 - 4.0)               | 2.9 (2.6 - 3.3)                |
| White          | 2016 | 53 (51-55)                            | -3                   | 0.06 | 62 (60-64)                            | -13                  | 0    | 6.6 (6.2 - 7.1)                                | 4.7 (4.3 - 5.2)               | 3.5 (3.1 - 3.9)                |

Highlighted P values, risk differences, and risk ratios are significant.

Ages are represented in months.

NA = Not applicable (upper limit of 95% confidence interval could not be calculated because it extends into censored values).

Table S7

Comparison of median age at autism spectrum disorder (ASD) identification among identified children, median age at ASD identification including unidentified children, and cumulative incidence of ASD identified by age 48 months per 1,000 children between Black or Hispanic children and White children by year in the ADDM Network

| Year | White                   |                               |                      | Black                   |             |      |                               |             |      | Hispanic             |                    |                 |                         |             |      |                               |             |      |                      |                    |                 |
|------|-------------------------|-------------------------------|----------------------|-------------------------|-------------|------|-------------------------------|-------------|------|----------------------|--------------------|-----------------|-------------------------|-------------|------|-------------------------------|-------------|------|----------------------|--------------------|-----------------|
|      | Median among identified | Median including unidentified | Cumulative incidence | Median among identified | B to W diff | P    | Median including unidentified | B to W diff | P    | Cumulative incidence | B to W diff        | B to W ratio    | Median among identified | H to W diff | P    | Median including unidentified | H to W diff | P    | Cumulative incidence | H to W diff        | H to W ratio    |
| 2002 | 56 (54-58)              | 75 (72-79)                    | 1.9 (1.7 - 2.1)      | 58 (55-61)              | 2           | 0.57 | 73 (69-78)                    | -2          | 0.65 | 1.3 (1.1 - 1.6)      | -0.6 (-0.8 - -0.3) | 0.7 (0.6 - 0.9) | 59 (54-63)              | 3           | 0.44 | 80 (71-96)                    | 5           | 0.4  | 1.0 (0.8 - 1.4)      | -0.9 (-1.2 - -0.5) | 0.5 (0.4 - 0.7) |
| 2004 | 57 (54-61)              | 72 (69-76)                    | 2.2 (1.9 - 2.5)      | 62.5 (59-67)            | 5.5         | 0.1  | 72 (69-76)                    | 0           | 1    | 1.7 (1.4 - 2.1)      | -0.5 (-1.0 - 0.0)  | 0.8 (0.6 - 1.0) | 64 (55-71)              | 7           | 0.23 | 91 (77-NA)                    | 19          | 0    | 1.0 (0.6 - 1.6)      | -1.2 (-1.7 - -0.5) | 0.5 (0.3 - 0.7) |
| 2006 | 54 (51-57)              | 69 (66-72)                    | 3.2 (2.9 - 3.5)      | 54 (51-57)              | 0           | 1    | 67 (63-71)                    | -2          | 0.61 | 2.2 (1.9 - 2.5)      | -1.0 (-1.4 - -0.6) | 0.7 (0.6 - 0.8) | 55 (49-60)              | 1           | 0.86 | 71.5 (64-80)                  | 2.5         | 0.58 | 1.6 (1.3 - 2.0)      | -1.6 (-2.0 - -1.1) | 0.5 (0.4 - 0.6) |
| 2008 | 54 (52-56)              | 68 (65-71)                    | 4.0 (3.7 - 4.3)      | 58 (54-61)              | 4           | 0.08 | 72 (69-76)                    | 4           | 0.17 | 2.8 (2.5 - 3.2)      | -1.2 (-1.7 - -0.7) | 0.7 (0.6 - 0.8) | 57 (53-60)              | 3           | 0.31 | 74 (68-79)                    | 6           | 0.06 | 2.1 (1.7 - 2.5)      | -2.0 (-2.4 - -1.5) | 0.5 (0.4 - 0.6) |
| 2010 | 53 (52-55)              | 64 (63-66)                    | 5.4 (5.1 - 5.7)      | 54 (52-56)              | 1           | 0.97 | 65 (63-69)                    | 1           | 0.76 | 3.9 (3.5 - 4.4)      | -1.5 (-2.0 - -0.9) | 0.7 (0.6 - 0.8) | 58 (55-60)              | 5           | 0.02 | 69 (66-72)                    | 5           | 0.02 | 2.8 (2.4 - 3.2)      | -2.6 (-3.1 - -2.1) | 0.5 (0.4 - 0.6) |
| 2012 | 52 (51-54)              | 63 (61-66)                    | 5.6 (5.3 - 6.0)      | 52 (50-55)              | 0           | 1    | 61 (58-63)                    | -2          | 0.52 | 4.8 (4.3 - 5.3)      | -0.8 (-1.5 - -0.2) | 0.8 (0.8 - 1.0) | 53 (50-57)              | 1           | 0.92 | 65 (61-68)                    | 2           | 0.61 | 3.4 (3.0 - 3.8)      | -2.3 (-2.8 - -1.7) | 0.6 (0.5 - 0.7) |
| 2014 | 55 (54-57)              | 65 (63-67)                    | 5.5 (5.2 - 5.9)      | 55 (52-57)              | 0           | 1    | 63 (61-66)                    | -2          | 0.46 | 5.4 (4.9 - 5.9)      | -0.1 (-0.8 - 0.5)  | 1.0 (0.9 - 1.1) | 53 (50-55)              | -2          | 0.34 | 65.5 (62-68)                  | 0.5         | 0.79 | 4.6 (4.1 - 5.2)      | -0.9 (-1.5 - -0.2) | 0.8 (0.7 - 1.0) |
| 2016 | 53 (51-55)              | 62 (60-64)                    | 6.6 (6.2 - 7.1)      | 53 (51-56)              | 0           | 1    | 60 (58-63)                    | -2          | 0.39 | 6.5 (5.9 - 7.2)      | -0.1 (-0.9 - 0.7)  | 1.0 (0.9 - 1.1) | 54 (51-56)              | 1           | 1    | 59 (57-62)                    | -3          | 0.13 | 5.6 (5.0 - 6.2)      | -1.0 (-1.8 - -0.3) | 0.8 (0.7 - 1.0) |

Highlighted P values, risk differences, and risk ratios are significant.

Ages are represented in months.

NA = Not applicable (upper limit of 95% confidence interval could not be calculated because it extends into censored values).

# Differences in early identification by race/ethnicity and co-occurring intellectual disability

Figure S5

Median age at autism spectrum disorder (ASD) identification among identified children, median age at ASD identification including unidentified children, and cumulative incidence of autism spectrum disorder (ASD) identification by age 48 months per 1,000 children by race/ethnicity and co-occurring intellectual disability by year in the ADDM Network

Note: Limited to sites with IQ data in ADDM surveillance reports; excludes children with unknown ID case status. Missing upper limits of 95% confidence intervals could not be calculated because they extend into censored values.

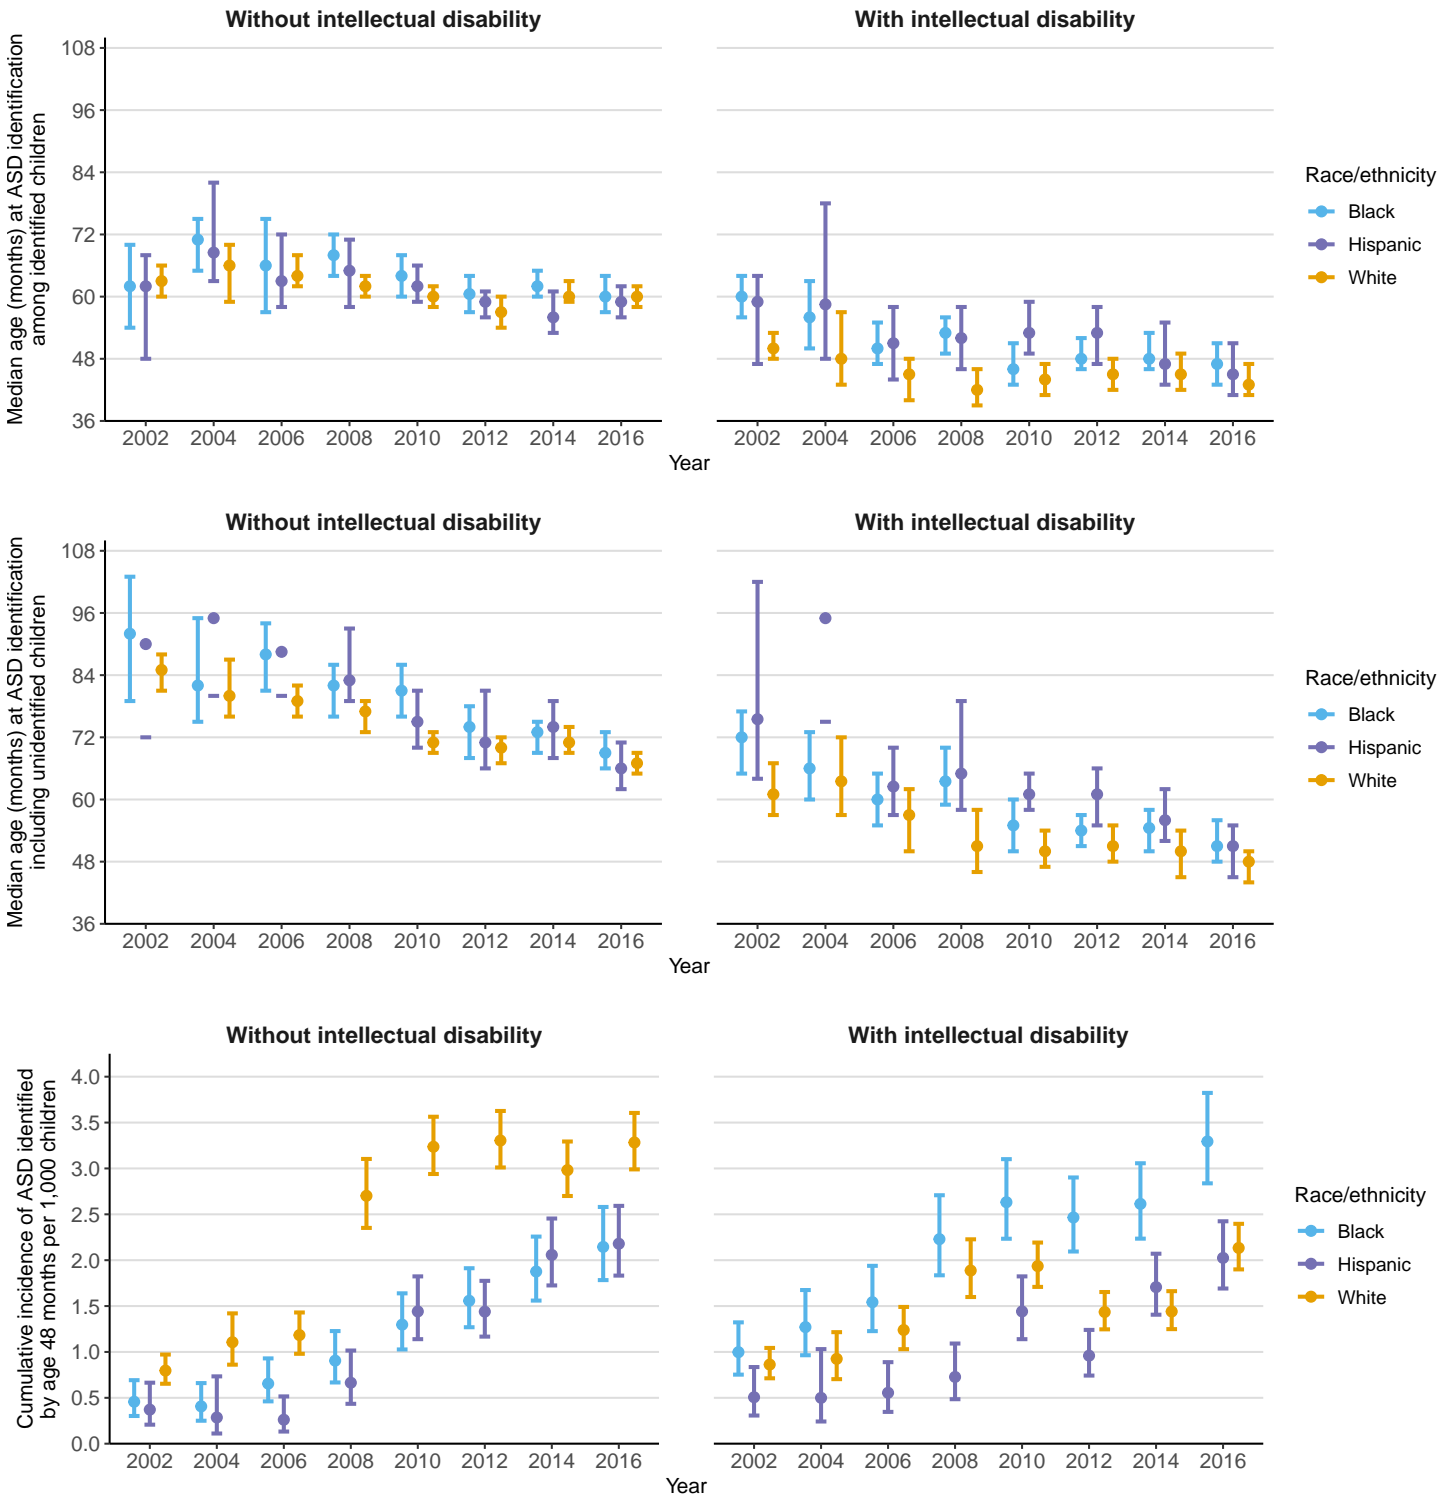

**Figure S6**

**Cumulative incidence of autism spectrum disorder (ASD) identification per 1,000 children at each month of age by race/ethnicity and co-occurring intellectual disability in 2016 in the ADDM Network**

The line indicates cumulative incidence of ASD identified by age 48 months per 1,000 children.

Note: Limited to sites with IQ data in ADDM surveillance reports; excludes children with unknown ID case status.

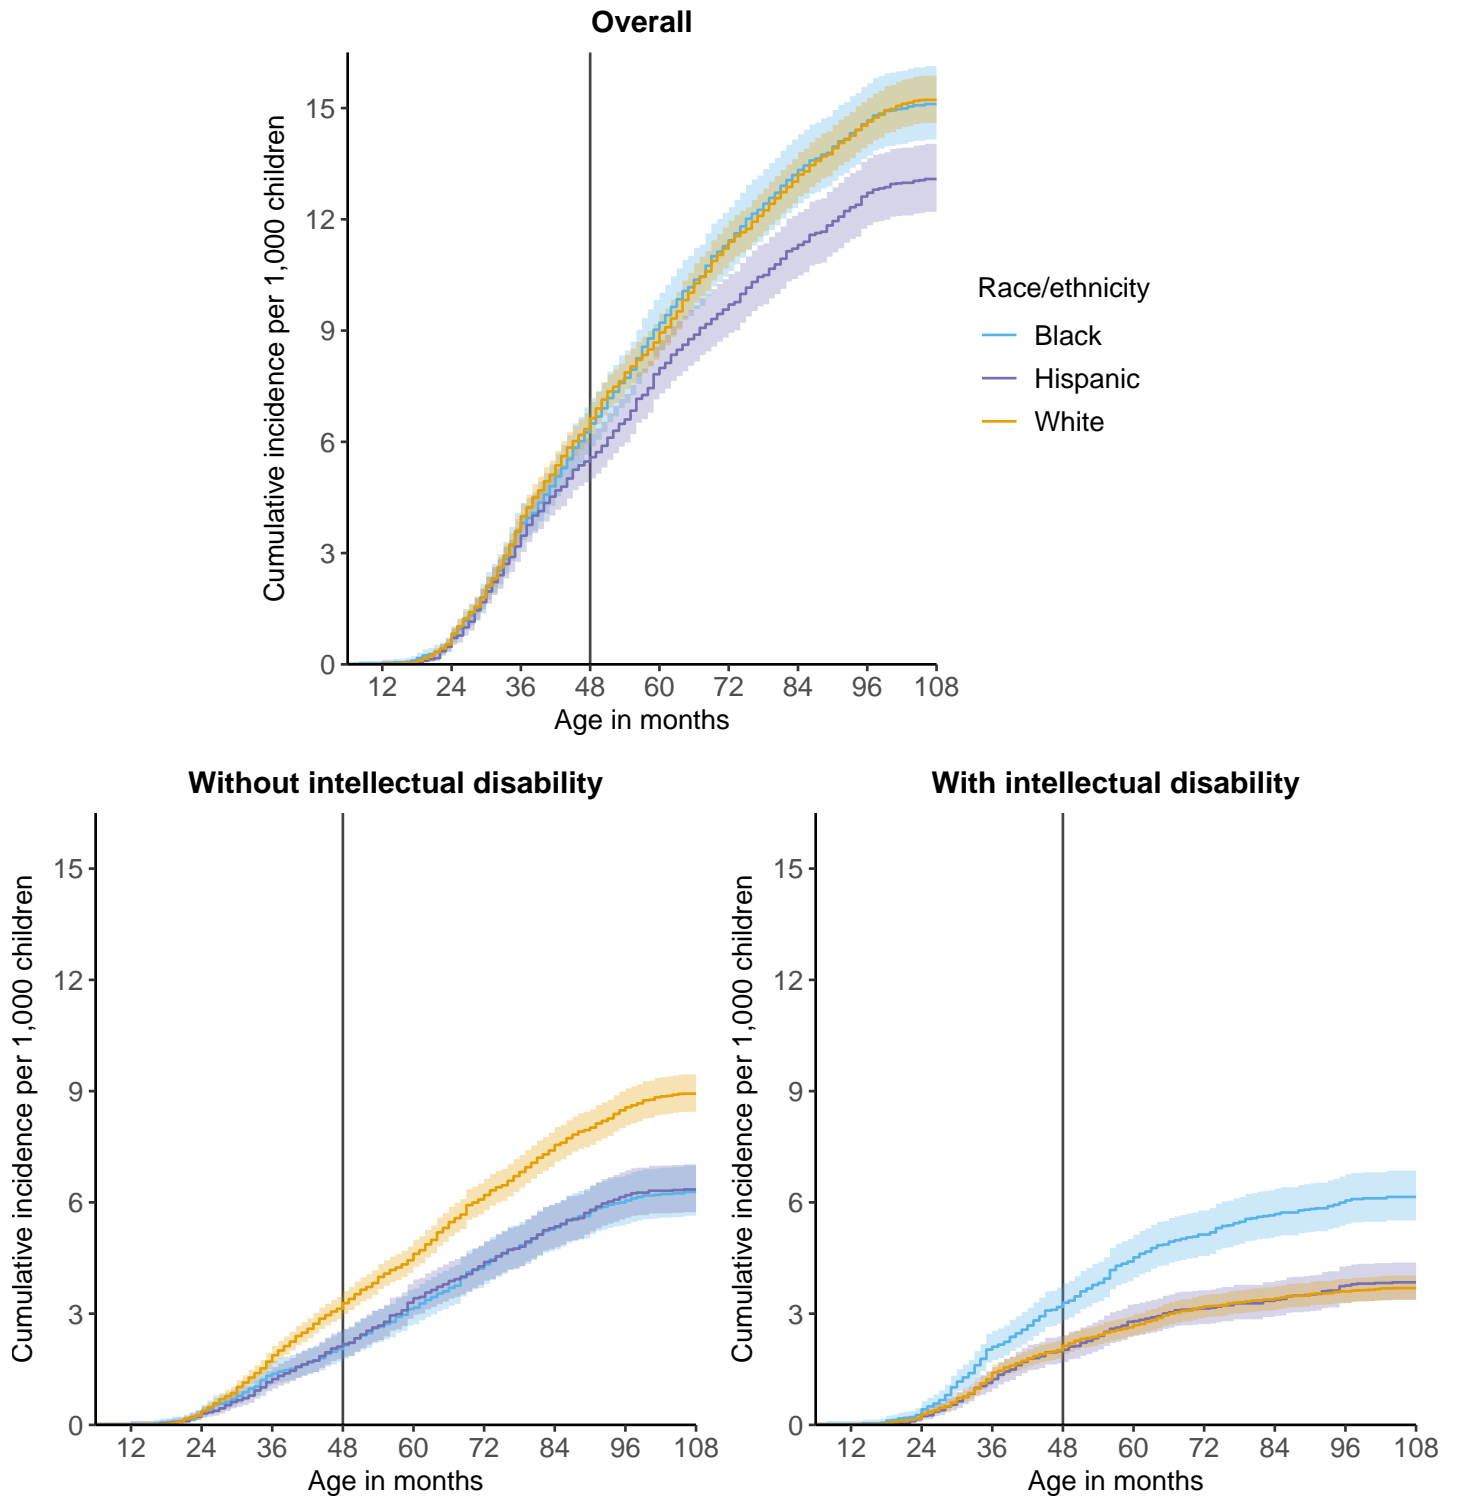

Table S8

Differences between Black or Hispanic children and White children in median age at autism spectrum disorder (ASD) identification among identified children, median age at ASD identification including unidentified children, and cumulative incidence of ASD identified by age 48 months per 1,000 children for children with and without co-occurring intellectual disability (ID) by year in the ADDM Network

Note: Limited to sites with IQ data in ADDM surveillance reports; excludes children with unknown ID case status.

| ID case status | Year | White                   |                               |                      | Black                   |             |      |                               |             |      | Hispanic             |                    |                 |                         |             |      |                               |             |      |                      |                    |                 |
|----------------|------|-------------------------|-------------------------------|----------------------|-------------------------|-------------|------|-------------------------------|-------------|------|----------------------|--------------------|-----------------|-------------------------|-------------|------|-------------------------------|-------------|------|----------------------|--------------------|-----------------|
|                |      | Median among identified | Median including unidentified | Cumulative incidence | Median among identified | B to W diff | p    | Median including unidentified | B to W diff | p    | Cumulative incidence | B to W diff        | B to W ratio    | Median among identified | H to W diff | p    | Median including unidentified | H to W diff | p    | Cumulative incidence | H to W diff        | H to W ratio    |
| Without ID     | 2002 | 63 (60-66)              | 85 (81-88)                    | 0.8 (0.7 - 1.0)      | 62 (54-70)              | -1          | 0.93 | 92 (79-103)                   | 7           | 0.18 | 0.5 (0.3 - 0.7)      | -0.3 (-0.6 - -0.1) | 0.6 (0.4 - 0.9) | 62 (48-68)              | -1          | 0.91 | 90 (72-NA)                    | 5           | 0.46 | 0.4 (0.2 - 0.7)      | -0.4 (-0.7 - -0.1) | 0.5 (0.3 - 0.9) |
| Without ID     | 2004 | 66 (59-70)              | 80 (76-87)                    | 1.1 (0.9 - 1.4)      | 71 (65-75)              | 5           | 0.36 | 82 (75-95)                    | 2           | 0.8  | 0.4 (0.3 - 0.7)      | -0.7 (-1.1 - -0.4) | 0.4 (0.2 - 0.6) | 68.5 (63-82)            | 2.5         | 0.83 | 95 (80-NA)                    | 15          | 0.06 | 0.3 (0.1 - 0.7)      | -0.8 (-1.2 - -0.3) | 0.3 (0.1 - 0.7) |
| Without ID     | 2006 | 64 (62-68)              | 79 (76-82)                    | 1.2 (1.0 - 1.4)      | 66 (57-75)              | 2           | 0.74 | 88 (81-94)                    | 9           | 0.03 | 0.7 (0.5 - 0.9)      | -0.5 (-0.8 - -0.2) | 0.6 (0.4 - 0.8) | 63 (58-72)              | -1          | 0.82 | 88.5 (80-NA)                  | 9.5         | 0.05 | 0.3 (0.1 - 0.5)      | -0.9 (-1.2 - -0.6) | 0.2 (0.1 - 0.4) |
| Without ID     | 2008 | 62 (60-64)              | 77 (73-79)                    | 2.7 (2.4 - 3.1)      | 68 (64-72)              | 6           | 0.03 | 82 (76-86)                    | 5           | 0.16 | 0.9 (0.7 - 1.2)      | -1.8 (-2.3 - -1.3) | 0.3 (0.2 - 0.5) | 65 (58-71)              | 3           | 0.39 | 83 (79-93)                    | 6           | 0.12 | 0.7 (0.4 - 1.0)      | -2.0 (-2.5 - -1.6) | 0.2 (0.2 - 0.4) |
| Without ID     | 2010 | 60 (58-62)              | 71 (69-73)                    | 3.2 (2.9 - 3.6)      | 64 (60-68)              | 4           | 0.11 | 81 (76-86)                    | 10          | 0    | 1.3 (1.0 - 1.6)      | -1.9 (-2.4 - -1.5) | 0.4 (0.3 - 0.5) | 62 (59-66)              | 2           | 0.54 | 75 (70-81)                    | 4           | 0.19 | 1.4 (1.1 - 1.8)      | -1.8 (-2.2 - -1.3) | 0.4 (0.3 - 0.6) |
| Without ID     | 2012 | 57 (54-60)              | 70 (67-72)                    | 3.3 (3.0 - 3.6)      | 60.5 (57-64)            | 3.5         | 0.22 | 74 (68-78)                    | 4           | 0.19 | 1.6 (1.3 - 1.9)      | -1.7 (-2.2 - -1.3) | 0.5 (0.4 - 0.6) | 59 (56-61)              | 2           | 0.6  | 71 (66-81)                    | 1           | 0.83 | 1.4 (1.2 - 1.8)      | -1.9 (-2.3 - -1.4) | 0.4 (0.3 - 0.5) |
| Without ID     | 2014 | 60 (59-63)              | 71 (69-74)                    | 3.0 (2.7 - 3.3)      | 62 (60-65)              | 2           | 0.36 | 73 (69-75)                    | 2           | 0.57 | 1.9 (1.6 - 2.3)      | -1.1 (-1.6 - -0.6) | 0.6 (0.5 - 0.8) | 56 (53-61)              | -4          | 0.08 | 74 (68-79)                    | 3           | 0.31 | 2.1 (1.7 - 2.5)      | -0.9 (-1.4 - -0.4) | 0.7 (0.6 - 0.8) |
| Without ID     | 2016 | 60 (58-62)              | 67 (65-69)                    | 3.3 (3.0 - 3.6)      | 60 (57-64)              | 0           | 1    | 69 (66-73)                    | 2           | 0.45 | 2.1 (1.8 - 2.6)      | -1.1 (-1.6 - -0.6) | 0.7 (0.5 - 0.8) | 59 (56-62)              | -1          | 0.86 | 66 (62-71)                    | -1          | 0.79 | 2.2 (1.8 - 2.6)      | -1.1 (-1.6 - -0.6) | 0.7 (0.5 - 0.8) |
| With ID        | 2002 | 50 (48-53)              | 61 (57-67)                    | 0.9 (0.7 - 1.0)      | 60 (56-64)              | 10          | 0    | 72 (65-77)                    | 11          | 0.01 | 1.0 (0.8 - 1.3)      | 0.1 (-0.2 - 0.5)   | 1.2 (0.8 - 1.6) | 59 (47-64)              | 9           | 0.06 | 75.5 (64-102)                 | 14.5        | 0.04 | 0.5 (0.3 - 0.8)      | -0.4 (-0.6 - 0.0)  | 0.6 (0.3 - 1.0) |
| With ID        | 2004 | 48 (43-57)              | 63.5 (57-72)                  | 0.9 (0.7 - 1.2)      | 56 (50-63)              | 8           | 0.12 | 66 (60-73)                    | 2.5         | 0.72 | 1.3 (1.0 - 1.7)      | 0.3 (-0.1 - 0.8)   | 1.4 (0.9 - 2.0) | 58.5 (48-78)            | 10.5        | 0.23 | 95 (75-NA)                    | 31.5        | 0.01 | 0.5 (0.2 - 1.0)      | -0.4 (-0.8 - 0.1)  | 0.5 (0.2 - 1.2) |
| With ID        | 2006 | 45 (40-48)              | 57 (50-62)                    | 1.2 (1.0 - 1.5)      | 50 (47-55)              | 5           | 0.04 | 60 (55-65)                    | 3           | 0.57 | 1.5 (1.2 - 1.9)      | 0.3 (-0.1 - 0.8)   | 1.2 (0.9 - 1.7) | 51 (44-58)              | 6           | 0.18 | 62.5 (57-70)                  | 5.5         | 0.23 | 0.6 (0.3 - 0.9)      | -0.7 (-1.0 - -0.3) | 0.4 (0.3 - 0.7) |
| With ID        | 2008 | 42 (39-46)              | 51 (46-58)                    | 1.9 (1.6 - 2.2)      | 53 (49-56)              | 11          | 0    | 63.5 (59-70)                  | 12.5        | 0    | 2.2 (1.8 - 2.7)      | 0.3 (-0.2 - 0.9)   | 1.2 (0.9 - 1.5) | 52 (46-58)              | 10          | 0    | 65 (58-79)                    | 14          | 0    | 0.7 (0.5 - 1.1)      | -1.2 (-1.6 - -0.7) | 0.4 (0.2 - 0.6) |
| With ID        | 2010 | 44 (41-47)              | 50 (47-54)                    | 1.9 (1.7 - 2.2)      | 46 (43-51)              | 2           | 0.5  | 55 (50-60)                    | 5           | 0.16 | 2.6 (2.2 - 3.1)      | 0.7 (0.2 - 1.2)    | 1.4 (1.1 - 1.7) | 53 (49-59)              | 9           | 0    | 61 (58-65)                    | 11          | 0    | 1.4 (1.1 - 1.8)      | -0.5 (-0.9 - -0.1) | 0.7 (0.6 - 1.0) |
| With ID        | 2012 | 45 (42-48)              | 51 (48-55)                    | 1.4 (1.2 - 1.7)      | 48 (46-52)              | 3           | 0.21 | 54 (51-57)                    | 3           | 0.41 | 2.5 (2.1 - 2.9)      | 1.0 (0.6 - 1.5)    | 1.7 (1.4 - 2.1) | 53 (47-58)              | 8           | 0.01 | 61 (55-66)                    | 10          | 0    | 1.0 (0.7 - 1.2)      | -0.5 (-0.8 - -0.1) | 0.7 (0.5 - 0.9) |
| With ID        | 2014 | 45 (42-49)              | 50 (45-54)                    | 1.4 (1.2 - 1.7)      | 48 (46-53)              | 3           | 0.29 | 54.5 (50-58)                  | 4.5         | 0.17 | 2.6 (2.2 - 3.1)      | 1.2 (0.7 - 1.7)    | 1.8 (1.5 - 2.2) | 47 (43-55)              | 2           | 0.44 | 56 (52-62)                    | 6           | 0.1  | 1.7 (1.4 - 2.1)      | 0.3 (-0.1 - 0.7)   | 1.2 (0.9 - 1.5) |
| With ID        | 2016 | 43 (41-47)              | 48 (44-50)                    | 2.1 (1.9 - 2.4)      | 47 (43-51)              | 4           | 0.17 | 51 (48-56)                    | 3           | 0.18 | 3.3 (2.8 - 3.8)      | 1.2 (0.6 - 1.7)    | 1.5 (1.3 - 1.9) | 45 (41-51)              | 2           | 0.54 | 51 (45-55)                    | 3           | 0.24 | 2.0 (1.7 - 2.4)      | -0.1 (-0.5 - 0.4)  | 0.9 (0.8 - 1.2) |

Highlighted P values, risk differences, and risk ratios are significant.

Ages are represented in months.

NA = Not applicable (upper limit of 95% confidence interval could not be calculated because it extends into censored values).

Figure S7

Cumulative incidence of autism spectrum disorder (ASD) identification per 1,000 children at each month of age by race/ethnicity and co-occurring intellectual disability by site in 2016 in the ADDM Network

The line indicates cumulative incidence of ASD identified by age 48 months per 1,000 children.

Note: Limited to sites with IQ data in ADDM surveillance reports; excludes children with unknown ID case status.

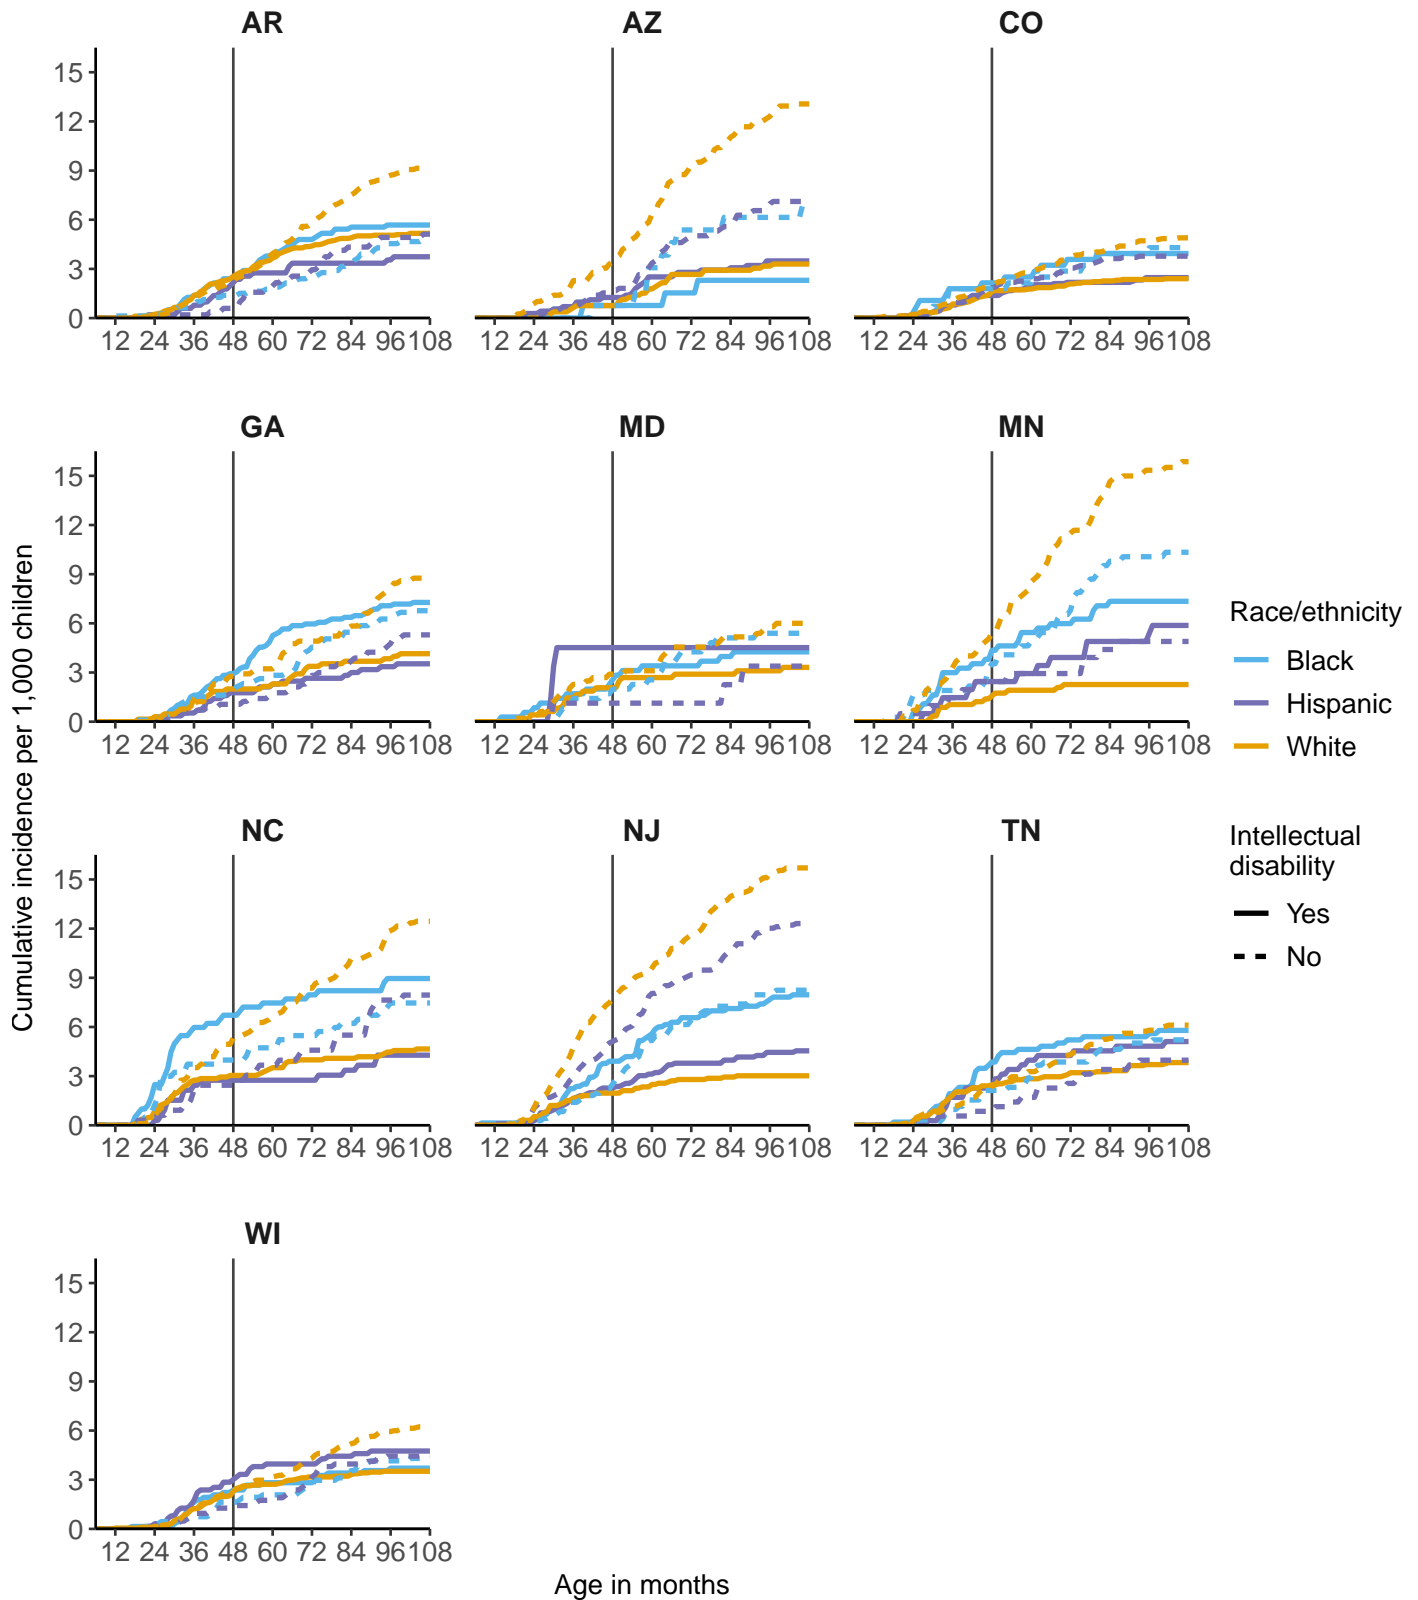



Table S9

Differences between Black or Hispanic children and White children in cumulative incidence of ASD identified by age 48 months per 1,000 children for children with and without co-occurring intellectual disability (ID) by site in 2016 in the ADDM Network

Note: Limited to sites with IQ data in ADDM surveillance reports; excludes children with unknown ID case status.

| ID case status | Site | Year | White                |                      | Black              |                 | Hispanic             |                    |                 |
|----------------|------|------|----------------------|----------------------|--------------------|-----------------|----------------------|--------------------|-----------------|
|                |      |      | Cumulative incidence | Cumulative incidence | B to W diff        | B to W ratio    | Cumulative incidence | H to W diff        | H to W ratio    |
| With ID        | AR   | 2016 | 2.5 (2.0 - 3.2)      | 2.5 (1.6 - 3.9)      | 0.0 (-1.2 - 1.4)   | 1.0 (0.6 - 1.6) | 2.2 (1.2 - 3.9)      | -0.4 (-1.6 - 1.4)  | 0.9 (0.5 - 1.6) |
| With ID        | AZ   | 2016 | 0.8 (0.3 - 1.7)      | 0.8 (0.0 - 4.3)      | 0.0 (-1.1 - 3.6)   | 1.0 (0.2 - 6.4) | 1.3 (0.7 - 2.4)      | 0.5 (-0.6 - 1.7)   | 1.6 (0.6 - 4.4) |
| With ID        | CO   | 2016 | 1.6 (1.2 - 2.3)      | 2.1 (1.0 - 4.7)      | 0.5 (-0.8 - 3.1)   | 1.3 (0.6 - 3.0) | 1.4 (0.9 - 2.2)      | -0.3 (-1.1 - 0.6)  | 0.8 (0.5 - 1.5) |
| With ID        | GA   | 2016 | 2.0 (1.2 - 3.4)      | 2.9 (2.0 - 4.2)      | 0.9 (-0.7 - 2.5)   | 1.5 (0.8 - 2.8) | 1.8 (1.0 - 3.2)      | -0.2 (-1.9 - 1.5)  | 0.9 (0.4 - 2.0) |
| With ID        | MD   | 2016 | 2.1 (1.1 - 3.8)      | 2.6 (1.3 - 4.8)      | 0.5 (-1.6 - 3.0)   | 1.2 (0.5 - 3.0) | 4.5 (1.8 - 11.6)     | 2.4 (-0.8 - 9.6)   | 2.2 (0.7 - 6.6) |
| With ID        | MN   | 2016 | 1.6 (0.8 - 3.0)      | 4.4 (2.7 - 7.1)      | 2.8 (0.6 - 5.6)    | 2.8 (1.3 - 6.1) | 2.4 (1.0 - 5.7)      | 0.9 (-1.1 - 4.2)   | 1.6 (0.5 - 4.4) |
| With ID        | NC   | 2016 | 3.0 (2.2 - 4.3)      | 6.7 (4.6 - 9.8)      | 3.7 (1.2 - 6.8)    | 2.2 (1.3 - 3.7) | 2.8 (1.4 - 5.2)      | -0.3 (-2.1 - 2.3)  | 0.9 (0.4 - 1.9) |
| With ID        | NJ   | 2016 | 2.0 (1.3 - 2.9)      | 3.9 (2.7 - 5.6)      | 1.9 (0.4 - 3.8)    | 2.0 (1.2 - 3.4) | 2.3 (1.5 - 3.4)      | 0.3 (-0.9 - 1.6)   | 1.2 (0.7 - 2.0) |
| With ID        | TN   | 2016 | 2.5 (1.8 - 3.4)      | 3.9 (2.5 - 6.0)      | 1.4 (-0.2 - 3.6)   | 1.6 (0.9 - 2.7) | 2.3 (1.2 - 4.5)      | -0.2 (-1.7 - 2.1)  | 0.9 (0.4 - 1.9) |
| With ID        | WI   | 2016 | 2.3 (1.7 - 3.0)      | 2.4 (1.5 - 3.9)      | 0.1 (-1.1 - 1.7)   | 1.0 (0.6 - 1.8) | 3.0 (1.9 - 4.7)      | 0.7 (-0.6 - 2.5)   | 1.3 (0.8 - 2.2) |
| Without ID     | AR   | 2016 | 2.2 (1.7 - 2.9)      | 1.4 (0.8 - 2.5)      | -0.8 (-1.8 - 0.3)  | 0.6 (0.3 - 1.2) | 0.6 (0.2 - 1.7)      | -1.6 (-2.4 - -0.4) | 0.3 (0.1 - 0.8) |
| Without ID     | AZ   | 2016 | 3.4 (2.4 - 5.0)      | 0.8 (0.0 - 4.3)      | -2.7 (-4.4 - 1.0)  | 0.2 (0.0 - 1.3) | 1.7 (1.0 - 2.9)      | -1.8 (-3.5 - -0.1) | 0.5 (0.3 - 1.0) |
| Without ID     | CO   | 2016 | 2.0 (1.5 - 2.7)      | 1.8 (0.8 - 4.2)      | -0.2 (-1.5 - 2.2)  | 0.9 (0.4 - 2.2) | 1.9 (1.3 - 2.8)      | -0.1 (-1.0 - 0.9)  | 0.9 (0.6 - 1.5) |
| Without ID     | GA   | 2016 | 2.8 (1.7 - 4.4)      | 1.9 (1.2 - 3.0)      | -0.8 (-2.6 - 0.6)  | 0.7 (0.4 - 1.3) | 1.1 (0.5 - 2.3)      | -1.7 (-3.4 - -0.1) | 0.4 (0.2 - 0.9) |
| Without ID     | MD   | 2016 | 2.9 (1.7 - 4.9)      | 2.0 (1.0 - 4.1)      | -0.9 (-3.1 - 1.5)  | 0.7 (0.3 - 1.6) | 1.1 (0.1 - 6.4)      | -1.8 (-4.0 - 3.5)  | 0.4 (0.1 - 2.3) |
| Without ID     | MN   | 2016 | 5.4 (3.8 - 7.7)      | 3.5 (2.1 - 6.0)      | -1.9 (-4.6 - 1.1)  | 0.7 (0.3 - 1.2) | 2.4 (1.0 - 5.7)      | -3.0 (-5.7 - 0.6)  | 0.5 (0.2 - 1.1) |
| Without ID     | NC   | 2016 | 5.3 (4.1 - 6.9)      | 4.0 (2.5 - 6.5)      | -1.3 (-3.6 - 1.4)  | 0.7 (0.4 - 1.3) | 2.4 (1.2 - 4.8)      | -2.9 (-4.9 - -0.3) | 0.5 (0.2 - 0.9) |
| Without ID     | NJ   | 2016 | 7.7 (6.3 - 9.3)      | 2.5 (1.6 - 4.0)      | -5.2 (-7.1 - -3.2) | 0.3 (0.2 - 0.5) | 5.1 (3.9 - 6.7)      | -2.6 (-4.6 - -0.5) | 0.7 (0.5 - 0.9) |
| Without ID     | TN   | 2016 | 2.4 (1.8 - 3.3)      | 2.1 (1.2 - 3.8)      | -0.3 (-1.6 - 1.5)  | 0.9 (0.5 - 1.7) | 0.9 (0.3 - 2.5)      | -1.6 (-2.6 - 0.2)  | 0.4 (0.1 - 1.1) |
| Without ID     | WI   | 2016 | 2.4 (1.8 - 3.1)      | 1.6 (0.9 - 2.9)      | -0.7 (-1.8 - 0.7)  | 0.7 (0.4 - 1.3) | 1.4 (0.8 - 2.7)      | -1.0 (-2.0 - 0.4)  | 0.6 (0.3 - 1.2) |

Highlighted P values, risk differences, and risk ratios are significant.

This page intentionally left blank
